1 Assessment of Potential Health and Genetic Impacts in Releasing

2 Confiscated *Paroaria coronata* and *Saltator similis*

3 Short Title: Potential Health and Genetic Impacts in Releasing of Confiscated Songbirds.

4

5 Cláudio E. F. Cruz<sup>1,2\*</sup>, Gustavo R. Funkler<sup>1,3</sup>, André L. S. Zani<sup>4</sup>, Paulo G. C. Wagner<sup>1,5</sup>,

6 Luciano N. Segura<sup>6</sup>, Inês Andretta<sup>7</sup>, Nelson J. R. Fagundes<sup>4,8</sup>

7

8 <sup>1</sup> Centro de Estudos em Manejo de Aves Silvestres, Faculdade de Veterinária,  
9 Universidade Federal do Rio Grande do Sul, Porto Alegre, Rio Grande do Sul, Brasil.

10

11 <sup>2</sup> Programa de Pós-Graduação em Ciências Veterinárias, Faculdade de Veterinária,  
12 Universidade Federal do Rio Grande do Sul, Porto Alegre, Rio Grande do Sul, Brasil.

13

14 <sup>3</sup> Laboratório Porto Belo. Porto Alegre, Rio Grande do Sul, Brasil.

15

16 <sup>4</sup> Programa de Pós-Graduação em Genética e Biologia Molecular, Instituto de  
17 Biociências, Universidade Federal do Rio Grande do Sul, Porto Alegre, Rio Grande do  
18 Sul, Brasil.

19

20 <sup>5</sup> Centro de Triagem de Animais Silvestres CETAS—Instituto Brasileiro do Meio  
21 Ambiente e dos Recursos Naturais Renováveis IBAMA. Porto Alegre, Rio Grande do  
22 Sul, Brasil.

23

24 <sup>6</sup> Universidad Nacional de La Plata. Museo de La Plata, Sección Ornitología, La Plata,  
25 Província de Buenos Aires, Argentina.

26

27 <sup>7</sup> Laboratório de Ensino Zootécnico. Faculdade de Agronomia, Universidade Federal do  
28 Rio Grande do Sul, Porto Alegre, Rio Grande do Sul, Brasil.

29

30 <sup>8</sup> Programa de Pós-Graduação em Biologia Animal, Instituto de Biociências,  
31 Universidade Federal do Rio Grande do Sul, Porto Alegre, Rio Grande do Sul, Brasil.

32

33 \* Corresponding author. E-mail address: [claudio.cruz@ufrgs.br](mailto:claudio.cruz@ufrgs.br) (C.E.F. Cruz).

34

## 35 **Abstract**

36 Illegal capture and trade of wild birds has long been a threat to biodiversity.  
37 Translocation—the release of individuals from one location into another—is a useful  
38 conservation tool in the management of species. However, both health (such as different  
39 pathogens) and adaptive (such as local adaptation), differences among populations must  
40 be taken into account, as both can impact the recipient population negatively. Here, we  
41 provide health and genetic information to support release planning for two of the most  
42 trafficked Brazilian wild bird species (*Paroaria coronata* and *Saltator similis*). We  
43 focused on two fundamental questions: Are there significant differences in pathogen load  
44 between wild and captive populations? Is there significant genetic structure among  
45 populations? In total, 223 free-living birds were captured, sampled, and released at the  
46 same site. Devices and live decoys characteristics were top factors influencing captures.  
47 We tested blood, feces, and oropharyngeal swabs from free-ranging (n=101) and  
48 confiscated (n=92) birds for Newcastle disease virus, *Salmonella* spp., and *Mycoplasma*  
49 *gallisepticum*. Genetic structure among populations was investigated using mtDNA in a  
50 subsample of these birds. We found no evidence for Newcastle disease virus and  
51 *Salmonella* spp. in seized and free-living birds from both species. However, seized *P.*  
52 *coronata* and *S. similis* may be potential sources of *M. gallisepticum*. We found  
53 significant but low genetic structure among populations occurring in different Biomes  
54 ( $\Phi_{CT}=0.26$  for *P. coronata*;  $\Phi_{CT}=0.13$  for *S. similis*) and no significant structure among  
55 populations occurring in the Pampa Biome. These results suggest that while it may be  
56 important to screen seized birds for avian pathogens, genetic structure among populations  
57 seems to be of lesser concern when planning the release of seized songbirds in the wild.

58

## 59 **Introduction**

60 Illegal trade, along with poaching, habitat loss, and pollution, are top causes of wild  
61 bird decline in Brazil and in other developing countries that harbor a huge species  
62 diversity [1–4]. The illegal wildlife trade has increased dramatically over the past decade,  
63 along with enforcement efforts aimed at mitigating this threat [5]. For confiscated wild  
64 birds, despite the shortage of studies on the subject, current translocation guidelines  
65 include as an option the euthanasia of individuals belonging to species of low  
66 conservation value [6,7]. In part, this policy can be justified on the grounds that a) seized  
67 birds may harbor pathogens that will affect the wild population [8] and b) usually, seized  
68 birds come from an unknown parental population, and their release in another population  
69 may result in outbreeding depression [9,10], resulting, in both cases, in a negative impact  
70 on the wild population. Health and genetic studies in wildlife species depend on direct  
71 capture for sampling free-ranging individuals and collecting relevant data to evaluate the  
72 sanitary and genetic risk of planned translocations. Ideally, such knowledge would allow  
73 the translocation of seized and rehabilitated birds to their most probable area of origin,  
74 with minimal health risks to the local populations and to the commercial flocks [5–8].  
75 Unfortunately, both genetic and health information on the subject is scarce. Despite the  
76 myriad of methods and tools available, mist nets are globally recognized as the top capture  
77 method in biological studies [11–13] and are increasingly applied in association with bird  
78 lure techniques to improve efficiency, mostly through playback audio [14]. In this sense,  
79 the use of artificial [15,16] or live decoys [17], although routinely and widely used in  
80 poaching, is only occasionally presented on scientific reports, albeit extensively  
81 disseminated in the virtual media.

82 In this study, we describe the methods for capturing and sampling wild *Paroaria*  
83 *coronata* (Red-crested Cardinal) and *Saltator similis* (Green-winged Saltator)—two of  
84 the most heavily trafficked Brazilian wild bird species, which are classified as of least

85 concern on the IUCN red list [18]. Next, we generate sanitary and genetic data to answer  
86 two fundamental questions: Are there significant differences in pathogen load between  
87 wild and captive populations? Is there significant genetic structure among populations?  
88 Finally, we discuss the potential impacts of a translocation program of confiscated  
89 conspecifics for both species.

90

## 91 **Materials and Methods**

### 92 **Ethical statement**

93 This project (no. 23644) was approved by the Ethics Committee on the Use of  
94 Animals—UFRGS—and licensed by the *Instituto Chico Mendes de Conservação da*  
95 *Biodiversidade* (ICMBio), under the number 37567. Samples received from Argentina  
96 were registered under the export permit code EX-2019-12969382-APN-DNBI#SGP.

97

### 98 **Sampled areas**

99 Sampling areas were selected to include representative areas of the species' usual  
100 distribution, mostly in Rio Grande do Sul state but also in strategic areas from the total  
101 species' distribution (Fig. 1, S1 Table). We captured *S. similis* in two different regions:  
102 Pampa and Atlantic Forest. Even though the Pampa is associated with open grasslands  
103 [19], we found *S. similis* always associated with forest paths as well as in the Atlantic  
104 Forest region. On its turns, we captured *P. coronata* in three different regions: Pampa,  
105 Atlantic Forest, and Chaco/Pantanal. In the Atlantic Forest, this species was associated  
106 with anthropic deforested paths. The Chaco/Pantanal region is characterized by savannah  
107 with a substantial forest component, especially in the Chaco, whose more humid portions  
108 are connected to the seasonally flooded Pantanal plain in Brazil [20–22]. Sample size was  
109 determined based on both pilot expeditions and on similar studies [23,24]. For the genetic

110 analyses we also included sequences from the GenBank (Bolívia n=1, Boracéia n=1,  
111 Corrientes n=2, Mato Grosso n=1) and an additional five *P. coronata* samples were  
112 received from the Buenos Aires area, Argentina.

113

114 **Fig. 1.** Geographical representation of sampled areas.

115

### 116 **Management of live decoys**

117 Dominant *P. coronata* and *S. similis* of both sexes, identified through bird song  
118 defiance (playback) among groups of birds seized from illegal traffic at the *Centro de*  
119 *Triagem de Animais Silvestres* (CETAS/IBAMA), Porto Alegre, RS were tentatively  
120 selected, tested, and kept as live decoys for attracting free-ranging conspecific birds.  
121 Upon joining the live decoy flock, birds had three consecutive fecal samples negative for  
122 parasites. Birds with positive samples were treated (anthelmintic and anticoccidial drugs).  
123 Only birds that systematically attracted conspecific birds in fieldwork were kept. Birds  
124 that failed 2–4 times consecutively were returned to CETAS. Seed mixtures, commercial  
125 rations, fruits, vegetables, arthropods, and minerals composed the birds' diets. During the  
126 capturing time (breeding season—August to February), the birds were kept in cages, and  
127 in the rest of the year, they were released in 12–24 m<sup>3</sup> outdoor aviaries. Bath bowls,  
128 sunbath, and cage tray cleaning (sand bedding exchange) were performed every other  
129 day.

130

### 131 **Fieldwork**

132 Initially, we used mist nets and cages mounted with net-trapdoors (Fig. 2A) for  
133 capturing both species. However, after successive unsuccessful attempts to capture *P.*  
134 *coronata*, a bird trap-loop (Fig. 2B and 2C) was built according to an Indochinese model

135 demonstrated on the internet [25], and used next to the decoy's cage. All capturing  
136 processes were timed.

137

138 **Fig. 2.** Schematic representation of capturing devices. A: cage with live decoy *Saltator*  
139 *similis*, showing details of spring that closes the net-trapdoor (1), net-trapdoor (2), trigger-  
140 perch (3), and metal hook holding the trigger-perch mounted and the net-trapdoor opened  
141 (4). B: loop with its parts numbered as the spring that pulls the fishing-rod which pulls  
142 the loop (5), fishing-rod (6), pin holding the trigger-perch mounted and fishing-rod (7),  
143 trigger-perch (8), brackets (nylon line folds) holding the loop open (9 and 10), and spring  
144 holding the trigger-perch up (11). C: *Paroaria coronata* captured in the loop.

145

146 Initial sampling was mostly conducted for studying genetic structure in both  
147 species. Blood samples (0.1 ml) were obtained by right jugular vein puncture with an  
148 insulin syringe [26] and conserved in FTA cards for subsequent genetic applications. A  
149 second round of capture expeditions was conducted for obtaining most samples for the  
150 sanitary study, in which 0.1 ml of blood (stored in Eppendorf tubes for serum separation),  
151 oropharyngeal swab, and feces (mostly after keeping the bird in a holding bag for up to  
152 30 min) were obtained. Such samples were tested for *M. gallisepticum* (MG) and  
153 Newcastle disease virus (NDV) serology, MG-PCR, and *Salmonella* spp. isolation,  
154 respectively. Samples for the sanitary studies were obtained from populations located up  
155 to 200 km from Porto Alegre, to make it possible to deliver them in the laboratory in the  
156 same day of collection. Samples were kept under refrigeration. The sampling period  
157 included the reproductive seasons of 2017, 2018, and 2019. After sampling, birds were  
158 banded and released in the same place of capturing. Additional data is shown in S1 Table.

159

160 **Sanitary tests**

161 The microbiological, serological, and molecular tests were performed at the Porto  
162 Belo Laboratory, accredited by the Brazilian Ministry of Agriculture, Livestock, and  
163 Supply (*Ministério da Agricultura, Pecuária e Abastecimento*—MAPA) to perform  
164 official diagnostic tests within the National Plan of Avian Sanity (*Plano Nacional de*  
165 *Sanidade Avícola*—PNSA).

166 Anti-NDV antibodies were searched for in serum samples by the Hemagglutination  
167 Inhibition Test according to the SDA ordinance n° 182, 08 November 1994. *Salmonella*  
168 spp. detection followed the methods presented in SDA ordinance n° 126, as of November  
169 03, 1995, after replacing BHI broth by buffered pebble water 1%. Suspected colonies  
170 were confirmed and characterized with specific antisera (serum agglutination on blade)  
171 at the Fundação Oswaldo Cruz, according to World Health Association protocols [27].  
172 For the detection of anti-MG antibodies, serum samples were tested by a rapid plate  
173 agglutination (RPA) test according to SDA ordinance n° 44, as of November 08, 2001. A  
174 real-time polymerase chain reaction assay using a Taqman-labeled probe for the detection  
175 of *M. gallisepticum* (commercial kit MG—NewGene®) DNA [28] was applied, and the  
176 positive results were sent for confirmation with a Multiplex real-time PCR [29] at Simbios  
177 Biotechnology.

178 Serum samples from three *P. coronata* and three *S. similis* vaccinated against MG  
179 and NDV served as controls for validation of the MG-qPCR and NDV-HI. Serum samples  
180 from these birds were tested before and after vaccination to serve as negative and positive  
181 controls, respectively. Vaccination protocols included one ocular drop from live vaccines  
182 *M. gallisepticum* (MYCOVAX-TS-11, MERIAL, strain TS-11, P.400/17, V.02/18,  
183 November 11, 2017) and NDV (MERIAL, strain La Sota 004/16, ND1873, P.004/16,  
184 V.04/18, December 01, 2017), boosters with live vaccines for MG (BIOCAMP, Camp

185 VacMG-F, P.006/2016, V.11/19, February 02, 2018) and NDV (BIOVET, New-Vacin,  
186 La Sota, P.007/17, V.05/19, February 23, 2018). An additional booster included an oil  
187 inactivated NDV (BIOVET, New-BRONK-VET, P.003/17, V.08/19, virus B1 La Sota,  
188 minimum titre before inactivation  $10^{5.3}$  DIOE<sub>50</sub>, March 23, 2018). Protocol was based on  
189 a previous study on NDV vaccination of wild birds [30]. For the sanitary analyses, we  
190 also included samples from birds confiscated from illegal handlers.  
191 <http://dx.doi.org/10.17504/protocols.io.bac3iayn>. [PROTOCOL DOI].

192

### 193 **Genetic analysis**

194 In order to understand the genetic structure and diversity of *P. coronata* and *S.*  
195 *similis*, we compared individuals from the Pampa region, in which both species occur in  
196 relative abundance, with *P. coronata* individuals from the Chaco/Pantanal region and *S.*  
197 *similis* from the Atlantic Forest region. There were few samples of *P. coronata* from the  
198 Atlantic Forest and of *S. similis* from the Chaco/Pantanal because these are not major  
199 occurrence regions for these species. This strategy also allowed us to compare two regions  
200 of more similar vegetation patterns (Pampa vs. Chaco/Pantanal, in the case of *P.*  
201 *coronata*) with two regions with more different vegetation patterns (Pampa vs. Atlantic  
202 Forest, in the case of *S. similis*). Further information about the genetic sampling is given  
203 in S2 Table.

204 DNA was extracted from the blood in FTA cards using the PureLink Genomic DNA  
205 Mini Kit (Invitrogen), and the fragment of the mitochondrial gene NADH dehydrogenase  
206 subunit 2 (*ND2*) was amplified using the same PCR protocol for both species. The  
207 reaction was performed with concentrations of 20 ng/μl of DNA, 1x PCR Buffer  
208 (Invitrogen), 3.5 mM MgCl<sub>2</sub>, 0.2 mM dNTPs, 0.2 pmol/μl of each primer, and 0.04 U/μl  
209 of Taq Platinum DNA Polymerase (Invitrogen). The primers used were MetL (described



210 by Hailer et al. [31], sequence 5'-AAGCTATCGGGCCCATACCCG-3') and RND2A  
211 (this study, sequence 5'-CCTGAGTTGCATTYAGGGG-3'), and the PCR conditions  
212 were as follows: 94°C for 2 min, 35 cycles of 94°C for 30 s, 59°C for 30 s, 72°C for 60  
213 s, and a final extension of 72°C for 8 min. The amplification was confirmed through  
214 electrophoresis in a 1% agarose gel. The amplified products purified enzymatically with  
215 exonuclease I (GE Healthcare) and Sanger sequenced by ACTGene Inc., Brazil.

216

## 217 **Data analysis**

218 For field work data, descriptive variables for each capture were recorded in a  
219 spreadsheet (S1 Table). A principal component analysis was performed based on Gower's  
220 universal similarity index using Past v.3 (University of Oslo, Oslo, Norway.  
221 <https://folk.uio.no/ohammer/past/>). We used the Spearman correlation coefficient to  
222 relate the principal component with each of the studied variables. In addition, the  
223 association among categorical variables was studied using the Pearson chi-square test for  
224 association. These tests were conducted in Minitab v. 18 (State College, Pennsylvania,  
225 USA. <http://www.minitab.com>) using 0.05 as the significance threshold. Responses were  
226 also accessed using descriptive statistics.

227 For molecular data, DNA sequences were assembled and aligned in the software  
228 Geneious v.10.2.3 (<https://www.geneious.com>) and checked by eye in MEGA X v.10.0.0  
229 [32]. We used DnaSP v.6.12.03 [33] to define all different haplotypes whose evolutionary  
230 relationships were represented using a Median-joining network [34], as estimated in the  
231 software PopART (<http://www.popart.otago.ac.nz>). Standard genetic diversity indices,  
232 including Tajima's D [35] and Fu's FS [36] neutrality tests were estimated using the  
233 program Arlequin v.3.5.2.2 [37]. We also used this program to quantify the level of  
234 genetic structure using both hierarchical and non-hierarchical Analysis of Molecular

235 Variance (AMOVA) [38]. The hierarchical AMOVA was performed for each species  
236 using the three collection regions (Pampa, Atlantic Forest, and Chaco/Pantanal). Non-  
237 hierarchical AMOVA was performed only for the Pampa region to explicitly compare the  
238 level of structure in the same region using a comparable sample strategy for both species.

239 Finally, to understand the past demography of both species, Bayesian Skylines plots  
240 (BSP) [39] were generated for the total population and the main occurrence regions of  
241 each one of them, using BEAST v.2.6.1 [40]. We used 10,000,000 MCMC steps,  
242 sampling every 1,000 steps and discarding the initial 10% of the sampling as burnin. We  
243 used a partition scheme allowing each codon position to have a different substitution  
244 model, which were estimated in MEGA X v.10 [32]. We checked sampling sufficiency  
245 of the MCMC and built the BSP in Tracer v.1.7.1 [41]. The molecular substitution rate  
246 for the ND2 gene was calculated as described previously [42], assuming the “calibration  
247 set 2” for a 45g bird [43,44].

248

## 249 **Results**

### 250 **Capturing birds in the wild**

251 In total, we performed 223 captures: 122 Saltators and 101 Cardinals (S1 Table).  
252 Net-trapdoors accounted for 36% of the captures, of which 97% were *S. similis* (Fig. 3).  
253 Catches using the loop method were 33% of the total, with a high prevalence of *P.*  
254 *coronata* (89%). The mist nets provided comparable catches in both species under study,  
255 with 53% being *S. similis*.

256

257 **Fig. 3.** Frequency and duration of each capture according to bird species and capturing  
258 method.

259

260 On average, it took 41.7 minutes ( $\pm 1.69$  minutes) for each bird capture, with similar  
261 values between species. Catches using the mist net were faster ( $32.8 \pm 2.9$  minutes)  
262 compared to captures performed with the net-trapdoor ( $43.1 \pm 1.9$  minutes) or loop ( $48.5$   
263  $\pm 3.6$  minutes) methods. The mist net also accounted for 62% of the captures performed  
264 in less than 25 minutes, which correspond to the first quartile of the database. The  
265 principal component analyses show that capture method was the most important factor  
266 discriminating between *P. coronata* and *S. similis* captures (Fig. 4).

267

268 **Fig. 4.** Principal component analysis indicating captures (dots symbols) and the variables  
269 having the highest explanatory power (lines).

270

271 Characteristics of the decoy were associated to all studied variables in the captured  
272 birds (Table 1), showing an important effect of the decoy in the capturing process. Some  
273 of these associations were very clear even before the statistical analysis. For instance, all  
274 captures involved conspecific decoys. Male decoys accounted for 99% of the captures of  
275 *S. similis*, while the captures of *P. coronata* were well distributed among decoy sexes  
276 (couple: 42%, male: 33%, and female: 25%). Among the female birds sampled, only 26%  
277 were captured using female decoys. A total of 60% of the female birds were captured  
278 using loop (almost exclusively *P. coronata*), while 75% of the male birds were captured  
279 using net-trapdoor or mist net, even though the low capture of female and young Saltators  
280 may bias these results. Decoys with a high ranking for dueling disposition and vocal  
281 performance (S3 Table) accounted for 96 and 98% of the fastest captures (performed in  
282 less than 25 minutes), respectively. Seven birds (~3%) died due to capturing/sampling  
283 procedures.

284

285 **Table 1.** Probability of association between characteristics of the captured bird (sex,  
286 species, and age—or duration of the capture) with characteristics of the decoy or with the  
287 method applied in the catch

288

| Decoy / Method                   | Captured bird / Duration of capture |                  |              |                       |
|----------------------------------|-------------------------------------|------------------|--------------|-----------------------|
|                                  | Sex                                 | Species          | Age          | Duration <sup>2</sup> |
| Sex                              | <b>&lt;0.001</b>                    | <b>&lt;0.001</b> | <b>0.001</b> | <b>0.024</b>          |
| Species                          | <b>&lt;0.001</b>                    | <b>&lt;0.001</b> | <b>0.009</b> | <b>&lt;0.001</b>      |
| Dueling disposition <sup>3</sup> | <b>&lt;0.001</b>                    | <b>0.047</b>     | <b>0.015</b> | <b>0.037</b>          |
| Vocal. performance <sup>3</sup>  | <b>0.027</b>                        | <b>&lt;0.001</b> | <b>0.005</b> | <b>0.045</b>          |
| Method                           | <b>&lt;0.001</b>                    | <b>&lt;0.001</b> | 0.095        | <b>&lt;0.001</b>      |

289

290 Probabilities obtained in the Pearson chi-square test for association. Significant values  
291 are shown in bold. <sup>2</sup>Duration was ranked in four classes according to the quartiles. <sup>3</sup>Each  
292 decoy was ranked in three classes according to its behavior and vocalizations during  
293 captures (S3 Table).

294

295 **Sanitary tests**

296 Data on the PNSA-associated tests performed on samples from both free-ranging  
297 and confiscated *P. coronata* and *S. similis* are presented in S4 Table. The serological  
298 study revealed no presence of antibodies against Newcastle disease, irrespective of the  
299 origin of the bird. *Salmonella* spp. isolation resulted in only one positive sample: *S.*  
300 *enterica* serovar Cerro from a free-ranging *P. coronata*. Two tests were applied for the  
301 detection of *M. gallisepticum* (MG). The RPA test indicated positive results for 25% of  
302 the samples from free-ranging birds, but none was confirmed by the PCR assay. On the  
303 other hand, seized birds showed positive results for MG in the RPA test in 53% of the  
304 samples, which was reduced to 13% when samples were tested by PCR. Most  
305 disagreement between the tests were 'false-positive' results. Despite this variation, results  
306 obtained by the RPA method were highly correlated ( $P < 0.001$ ) with the results obtained  
307 by PCR when assessed by a Pearson chi-square test.

308

309 **Genetic structure and diversity**

310 DNA sequence analysis resulted in an alignment of 977 bp and 810 bp for *P.*  
311 *coronata* and *S. similis*, respectively. All new sequences were deposited in GenBank (S2  
312 Table). Genetic diversity indices for both species in all sampled regions are shown in  
313 Table 2. Overall, there was higher genetic diversity in *S. similis* than in *P. coronata* for  
314 both the whole sample as well as in the Pampa region. However, we found contrasting  
315 patterns between species when the two major regions of occurrence were compared.  
316 While for *S. similis*, the Pampa and Atlantic Forest have comparable levels of diversity,  
317 for *P. coronata*, the Pampa has only a fraction of the diversity contained in the  
318 Chaco/Pantanal region, which is also clear from the haplotype network (Fig. 5). For both  
319 species, the sample size in regions of minor occurrence (Atlantic Forest in the case of *P.*

320 *coronata* or Chaco/Pantanal in the case of *S. similis*) is too low to allow for a through  
321 characterization of the genetic diversity.

322 **Table 2.** Standard genetic diversity indices for *P. coronata* and *S. similis*.

|                 | Source          | Sample size | N Loc | Segregating sites | N Haplot | Haplotype diversity <sup>1</sup> | Nucleotide diversity <sup>1</sup> | Tajima's D <sup>2</sup> | Fu's Fs <sup>2</sup> |
|-----------------|-----------------|-------------|-------|-------------------|----------|----------------------------------|-----------------------------------|-------------------------|----------------------|
|                 | Pampa           | 43          | 8     | 7                 | 6        | 0.41 (0.09)                      | 0.0006 (0.0005)                   | <b>-1.82</b>            | <b>-3.18</b>         |
| <i>Paroaria</i> | Chaco/Pantanal  | 13          | 3     | 25                | 9        | 0.92 (0.06)                      | 0.0066 (0.0038)                   | -0.86                   | -1.02                |
| <i>coronata</i> | Atlantic Forest | 3           | 1     | 2                 | 3        | 1.00 (0.27)                      | 0.0014 (0.0014)                   | 0.00                    | -1.22                |
|                 | Total           | 59          | 12    | 30                | 14       | 0.60 (0.07)                      | 0.0022 (0.0014)                   | <b>-2.17</b>            | <b>-4.76</b>         |
|                 | Pampa           | 45          | 9     | 26                | 14       | 0.86 (0.04)                      | 0.0058 (0.0032)                   | -0.69                   | -1.24                |
| <i>Saltator</i> | Chaco/Pantanal  | 3           | 2     | 2                 | 2        | 0.67 (0.31)                      | 0.0017 (0.0017)                   | 0.00                    | 1.06                 |
| <i>similis</i>  | Atlantic Forest | 27          | 7     | 26                | 18       | 0.93 (0.04)                      | 0.0042 (0.0025)                   | <b>-1.79</b>            | <b>-11.37</b>        |
|                 | Total           | 75          | 18    | 43                | 27       | 0.90 (0.03)                      | 0.0055 (0.0031)                   | <b>-1.59</b>            | <b>-10.65</b>        |

323 N Loc: N umber of localities; N Haplot: Number of haplotypes; <sup>1</sup>Values in parenthesis are the standard deviation; <sup>2</sup>Values in bold have a P-value

324 &lt;0.05 for Tajima's D and &lt;0.02 for Fu's Fs.

325

326 **Fig. 5.** Median-joining network for the haplotypes of *P. coronata* (A) and *S. similis* (B).  
327 The circle's size is proportional to the number of individuals in the sample with that  
328 haplotype. The transversal lines in the connectors represent the mutational steps.

329

330 The haplotype network for both species (Fig. 5) also suggests a relatively low  
331 degree of genetic structure among regions for both species. Indeed, when all regions are  
332 considered, 26.18% of the total genetic variance ( $\Phi_{CT}=0.2618$ ;  $P=0.040$ ) occurs among  
333 regions for *P. coronata*, while for *S. similis*, this value is only 12.94% ( $\Phi_{CT}=0.1294$ ;  
334  $P<0.001$ ). On the other hand, most of the genetic variation occurs within populations:  
335 65.17% ( $\Phi_{ST}=0.3483$ ;  $P<0.001$ ) and 82.72% ( $\Phi_{ST}=0.1728$ ;  $P=0.011$ ) for *P. coronata* and  
336 *S. similis*, respectively. The genetic structure among populations within regions  
337 corresponds to the remaining portion of genetic variance, but this value was not  
338 significant for both species ( $\Phi_{SC}=0.1171$ ;  $P=0.069$  and  $\Phi_{SC}=0.0499$ ;  $P=0.090$  for *P.*  
339 *coronata* and *S. similis*, respectively). When only the Pampa region is considered, there  
340 is no significant genetic structure for either species ( $\Phi_{ST}=-0.0510$ ;  $P=0.923$  and  
341  $\Phi_{ST}=0.0711$ ;  $P=0.107$  for *P. coronata* and *S. similis*, respectively), corroborating the high  
342 general genetic homogeneity within regions shown in the previous analysis.

343 We found evidence for population growth in both species judging by both Tajima's  
344 D and Fu's FS statistics (Table 2). However, while in *P. coronata* this signal is only found  
345 in the Pampa region, in *S. similis*, it is exclusive from the Atlantic Forest region. The  
346 Bayesian Skyline analyses are congruent with these signals (Fig. 6). Population expansion  
347 in *P. coronata* seems to be more recent (~50,000 years ago) and less dramatic than in *S.*  
348 *similis*, whose expansion seems to have occurred ~350,000 years ago.

349



350 **Fig. 6.** Bayesian Skylines plots for *P. coronata* (A) and *S. similis* (B). The time scale is  
351 in thousands of years. The effective population size is multiplied by the generation time  
352 in the y-axis ( $N_e \times G$ ). The colors indicate the region of the population considered: Total  
353 population—grey; Pampa—purple; Chaco/Pantanal—orange; Atlantic Forest—green.

354

## 355 **Discussion**

356 Our planet faces many biodiversity conservation challenges to fulfill the needs of  
357 an ever-growing human overpopulation [3,4]. Considering the limitation of financial  
358 resources for conservation, it is understandable that non-threatened species do not retain  
359 high conservation priority [3,5,6]. Indeed, neither the IUCN [5,6] nor the Brazilian  
360 Ornithological Society [7] recommend translocation as a valuable conservation tool for  
361 non-threatened confiscated wild birds, as the cost of returning birds to the wild in a  
362 responsible manner can be prohibitive [6]. However, options other than humane killing  
363 of several thousand wild passerines deserve consistent investigation, since euthanizing a  
364 high numbers of wild birds annually [45,46] involves ethical issues and may be  
365 incongruent with species conservation, especially in the long-term [1,3]. In fact, there has  
366 been some evidence that common species also can be susceptible to population declines  
367 [47]. The IUCN recognizes that returning confiscated animals of low conservation value  
368 to the wild may be valid, given that there are available resources and that translocation is  
369 undertaken in accordance with standard conservation guidelines, which should be based  
370 on genetic and sanitary information in addition to a number of other studies [5,6]. *S.*  
371 *similis* and *P. coronata* are among the most trafficked passerine species in Brazil  
372 [45,46,48,49], which configures a legal and conservation challenge even if these species  
373 are considered as of least concern on the IUCN red list [18]. Thus, genetic [50,51] and

374 health [52] data from these species may help to substantiate decisions on  
375 rehabilitation/release programs.

376

### 377 **Capturing and sampling wild birds**

378 In this study, after consecutive unsuccessful attempts at capturing live birds, we  
379 used live decoys in association with cages mounted with net-trapdoors, Indochinese  
380 loops, and mist-nets. Live conspecific decoys have long been among the poachers'  
381 practices for supplying illegal trade with wild birds [17]. This method simulates a  
382 territorial intrusion, which provides adequate capture opportunities, especially during the  
383 breeding season, since birds are prone to fight for defending their territories and are  
384 willing to mate [53]. Previously, baiting an area for a couple weeks to entice birds could  
385 facilitate the captures [12]; however, most of the capturing areas were visited only at the  
386 capture time.

387 Of the 223 catches, 83 were trapped in the net-trapdoors, of which almost all were  
388 *S. similis*, which readily engage in combat. On their turn, *P. coronata* are shyer,  
389 evaluating their opponents for long periods, hardly perching on unknown devices, and  
390 avoiding shaded areas that are suitable for mist netting. In this context, the use of loops  
391 camouflaged under a perch allowed the capture of this elusive species, even with the  
392 highest mean waiting-time recorded in the study. Loops were used to capture *S. similis*  
393 only in specific occasions, such as when it systematically perched in the same place and  
394 did not attack the decoy's cage. Mist nets provided comparable catches in both species  
395 under study (Fig. 3, Fig. 4).

396 The average target-catches per day was ~ 2.5, much lower than the 10.2 reported  
397 recently [14]. Unlike the aforementioned study, we spent considerable time on the road.  
398 Furthermore, the increase in the number of daily captures over time (S1 Table) suggests

399 the importance of team learning by practice [54,55]. For example, mist-netting masked  
400 by medium height vegetation or wood board fencing, under cloudy or shaded conditions,  
401 created additional opportunities for capturing open area birds such as *P. coronata*.  
402 Although with a greater effort for installing and linked to most of the non-target captures,  
403 the mist net was the fastest (33 minutes) capturing method for both species (Fig. 3).

404 During the three-year period, only four out of 24 birds that were selected as live  
405 decoys showed persistently high dueling disposition. The head down and retracted tuft of  
406 mute Cardinals and the ruffled feathers, low chirping, and open fallen wings of Saltators  
407 were submission behaviors observed under the free-ranging rival challenge. It has also  
408 been shown that in some bird species, males utilize vocal performance to evaluate  
409 competitors [53,56]. In our study, one specific *S. similis* decoy that whistled an obvious  
410 longer and louder terminal trill was associated with many catches (n=58). This individual  
411 likely elicited a wider territorial response to the song performance of this “intruder”,  
412 similarly to what has been reported for *Zonotrichia leucophrys* males [56]. Thus, the  
413 efficiency of the decoy and, consequently, of the capture was associated with the level of  
414 the decoy’s song performance or underlying health and vigor [53]. In most occasions in  
415 which decoys became mute and submissive, the free-living conspecific bird gave up the  
416 fight and left. However, as long as we had a replacement decoy, methods were effective  
417 and the target species were not captured, mostly when we couldn’t find them.

418 Data on mortality rates in surveys involving bird capture are scarce and usually rely  
419 only on mist-netting [57,58]. While these studies report much lower mortality rates, they  
420 do not involve sampling of biological tissues. It is likely that most of the birds that died  
421 during collection, suffered from hemorrhages secondary to blood sampling. As an attempt  
422 to minimize such losses (S1 Table), blood collection was limited to 0.1 ml per bird,  
423 instead of 0.2 ml as we did at the beginning of the fieldwork.

424

## 425 **Sanitary and health issues**

426 While there is a long list of diseases affecting wild birds [59], we decided to  
427 investigate only diseases addressed on the PNSA (i.e., Salmonellosis, mycoplasmosis,  
428 and Newcastle disease) due to its associated economical relevance [60] and because  
429 investigations about PNSA-associated pathogenic agents in wild passerines are rare.

430 All samples tested for the presence of anti-NDV antibodies were negative in this  
431 study. Comparable results have been divulgated in NDV serological surveys in seized  
432 Passeriformes, even though positive results have been observed in other avian orders [61].  
433 Monitoring free-ranging wild birds have shown the same tendency [62].

434 *Salmonella Enteritidis* and *Salmonella Typhimurium* are, respectively, the  
435 serotypes most prevalent and most commonly associated with disease in wild birds [63].  
436 However, prevalence of *Salmonella* in wild birds seems to be low and expositions have  
437 been attributed to man/domestic animals-contaminated environments [64]. Indeed,  
438 previous studies estimated the prevalence of *Salmonella* in samples of wild birds,  
439 including in passerines confiscated from illegal traffic, at between 1–7% [59,65–67]. In  
440 our sample, only one fecal sample (0.7%) was positive for *Salmonella* cultivation and  
441 isolation, which is consistent with a previous study on *Paroaria* sp. in which *Escherichia*  
442 *coli* and *Klebsiella* spp., among others, were detected in much higher numbers than  
443 *Salmonella* [67]. The positive sample was *Salmonella enterica* serovar Cerro (Group K).  
444 This serovar has been linked to poultry feedstock and rations [68] and commercial laying  
445 farms [69] and has high prevalence among cattle herds [70], which was the case here,  
446 even though the meaning of this finding for the health of this free-ranging Red-crested  
447 Cardinal population remains to be investigated.

448 We found higher prevalence for MG using the RPA test compared to the qPCR  
449 assay for both free-living and seized birds, which was expected due to the limited  
450 accuracy of RPA [29]. MG-prevalence in poultry and wild birds has usually been higher  
451 under RPA than in other tests [71–73]. The qPCR-based estimate of 13% in MG  
452 prevalence in the seized group is comparable to what has been found in other avian hosts  
453 [74–76]. Similarly, the higher MG prevalence in seized birds probably reflects the poor  
454 hygiene and stressful conditions to which these birds are subjected [59]. Even though MG  
455 exposure has been reported for wild birds [71,74,77], the lack of qPCR-based positive  
456 samples for MG is in agreement with another Brazilian study that sampled wild birds in  
457 poultry farms surrounded by forest remnants [78]. Even though none of the positive  
458 individuals in our sample showed any clinical evidence of infection, differential MG-  
459 susceptibility across bird species has been observed after experimental infections that  
460 resulted in both clinical and subclinical symptoms [79], which also occurred in wild birds  
461 [74,77,80]. Disease outbreaks in free-ranging and captive wild bird have been recorded,  
462 suggesting a potential reservoir for the pathogen in nature [81–83], reinforcing the need  
463 of a reliable MG assay for elucidating the role of MG in populations of wild birds.

464

#### 465 **Genetic diversity, structure, and implications of outbreeding depression**

466 The two species revealed different levels of genetic diversity and different  
467 evolutionary demographic histories. *S. similis* had overall higher genetic diversity, a more  
468 ancient population expansion restricted to the populations in the Atlantic Forest (while  
469 the Pampa population remained constant), and similar levels of diversity between the  
470 Pampa and the Atlantic Forest, its major regions of occurrence. On its turn, *P. coronata*  
471 had lower diversity, a weaker and more recent population restricted to the populations in

472 the Pampa (while the Chaco/Pantanal population remained constant), and lower diversity  
473 in the Pampa compared to the Chaco/Pantanal region (Table 2, Fig. 5, Fig. 6).

474 When compared to other passerines, mainly from open areas and/or dry forests in  
475 Southern South America [84,85], *P. coronata* from the Chaco/Pantanal had a high  
476 diversity at both the haplotype and nucleotide level. Even though some population of  
477 *Gubernatrix cristata*, a highly endangered Thraupidae, had higher nucleotide diversity  
478 values [84], this study used the mtDNA control region (mtDNA-CR) as a genetic marker,  
479 which evolves faster than ND2 [86]. On the other hand, *P. coronata* from the Pampa had  
480 a low diversity at both indices. This may indicate that the population inhabiting the Pampa  
481 biome is a recent offshoot from the Chaco/Pantanal region, which may have acted as a  
482 large source population for this species. This is compatible with the exclusive signal of  
483 population expansion in the Pampa around 50,000 years ago (Fig. 6), as population  
484 growth is usually expected in refuge areas [87].

485 Compared to other passerines more associated with the Brazilian Atlantic Forest  
486 and other associated humid forests, *S. similis* revealed a high diversity both in the Pampa  
487 as well as in the Atlantic Forest regions. Considering studies that used mtDNA coding  
488 genes only [88–95], *S. similis* from the Atlantic Forest had the highest value for a forest-  
489 associated species (only lower than *P. coronata* from the Chaco/Pantanal), while the  
490 Pampa population had the fifth highest value. Haplotype diversity values for both  
491 populations are also among the highest for passerines associated with the Atlantic Forest  
492 [88–95]. The exclusive signal of an ancient population expansion for *S. similis* in the  
493 Atlantic Forest region but not in the Pampa is curious. First, most studies that detected a  
494 population expansion in specific populations or phylogroups suggest much more recent  
495 timescales (similar to *P. coronata*) [90,92,94,96]. The two exceptions that report older  
496 expansions are *Schiffornis virescens* [91] and *Basileuterus leucoblepharus* [92], around

497 150,000–300,000 years ago. The high genetic diversity and lack of a signal of population  
498 expansion in the Pampa is intriguing. It is unlikely that the Pampa behaved as a refuge  
499 area for this species, which is strongly associated with humid forests northern to the  
500 Pampa region. Besides, the Atlantic Forest has higher genetic diversity than the Pampa,  
501 which is not compatible with a scenario in which the population in a refuge – the Pampa  
502 – occupies the Atlantic Forest and expands thereafter. Taken together, the lack of strong  
503 genetic structure between these populations may indicate that the Pampa was occupied in  
504 consequence of the population expansion in the Atlantic Forest but subsequently lost  
505 genetic diversity, which eroded the signal of an ancient expansion.

506 We also found a very weak genetic structure for both *P. coronata* and *S. similis*  
507 (Fig. 6). In the Pampa and associated dry forests, both *Gubernatrix cristata* [84] and  
508 *Phytotoma rutila* [85] showed stronger structure among habitats ( $\Phi_{ST} \sim 0.45$ ). For forest  
509 species, most studies reported the presence of strongly differentiated phylogroups either  
510 between different habitats or across the Atlantic Forest [88–90,93–99]. Again, the  
511 exceptions are *Schiffornis virescens* [91] and *Basileuterus leucoblepharus* [92], which  
512 showed no phylogeographic breaks across its distribution in the Atlantic Forest. The lack  
513 of genetic structure in *S. similis* is corroborated by a study that, based on nine  
514 microsatellite (SSR) loci, reported that only 0.1% of the total genetic variation occurred  
515 among populations distributed in different Brazilian biomes (Atlantic Forest, Cerrado,  
516 Caatinga and ecotones between these) [50]. Similarly, even though no study has  
517 characterized *P. coronata* populations for SSR variation, the closely related species *P.*  
518 *dominicana*, which occurs in the Brazilian northeast, showed that only 3% of the total  
519 genetic variation occurred among populations. [50]. Thus, the high genetic connectivity  
520 among populations does not seem to be an artifact from using only mtDNA.

521 The shallow population differentiation found in this study may have important  
522 consequences for conservation policies. Even though genetic distance is not a good  
523 predictor of outbreeding depression [100], outbreeding depression requires different  
524 genetic adaptations to local environments that will be broken by crossing individuals from  
525 exogenous populations [9,10,101]. The high historic genetic connectivity across  
526 populations of both species suggests that the overall risk of outbreeding depression is low  
527 [101].

528

### 529 **Concluding remarks**

530 The management of birds seized from illegal traffic is a complex and difficult  
531 question; Even though the recommendation for euthanizing individuals belonging to  
532 species of low conservation value may be justified [6,7], could new information for focal  
533 species reduce the perceived risk of translocation to the point that this could become a  
534 standard practice? In this study, we showed that it may be feasible to screen seized birds  
535 for several pathogens and that while the overall prevalence rates are low, the risk of  
536 disease transmission during bird management or after release in natural environments  
537 justifies a systematic sanitary screening. In addition, applying an adequate quarantine  
538 period for all seized birds seems to be both feasible and indispensable for maintaining  
539 proper sanitary conditions of the wild bird populations in translocation/reintroduction  
540 initiatives. Furthermore, systematic pathological investigations on confiscated birds  
541 dying during the quarantine/rehabilitation processes may point to additional relevant  
542 conditions to be included on the health screening.

543 The shallow genetic structure found for both species suggest that the overall risk  
544 of outbreeding depression following translocation is low. Yet, additional criteria could be  
545 used to choose an area for translocating individuals. For example, using different regional



546 vocal “dialects” as a proxy for the original parental population of an individual [102].  
547 Vocal plasticity exhibited by several species may indicate that, for the undetermined  
548 cases, reintroduced birds will be able to adapt to their release sites [102]. Another eventual  
549 strategy could be releasing the birds close to the apprehension site. Conservationist  
550 policymakers should consider when translocating seized individuals into wild populations  
551 could represent a safe and useful strategy for maintaining large and healthy wild  
552 populations for species highly targeted for illegal trade, irrespective of their conservation  
553 status.

554

## 555 **Acknowledgements**

556 We are grateful to CMPC Celulose Riograndense Ltda. for financial support and  
557 to the land owners who allowed access to their property to conduct fieldwork, especially  
558 to Biesdorf Family (Eldorado do Sul), Helena and Edegardo Velho, Ronaldo Bicca,  
559 André Carvalho (Mostardas), Paulo and Fernando Menezes (Cachoeira do Sul), Ione  
560 Ferreira, César Silveira (Encruzilhada do Sul), Teófilo Garcia (Santo Antônio das  
561 Missões), Ivan Pereira, Arcídio Trojan (Alegrete), Livia Quoos, Mauro Amaral (Rosário  
562 do Sul), Ênio Brito (Santa Vitória do Palmar), and Gildomar Monte (Rio Grande), but  
563 also to André Thuronyi, Guilherme Arruda, Denise Senna (Poconé), Débora Murgol  
564 (Santo Antônio do Pinhal) and João Venturini (Corumbá). We thank Armando Garcia,  
565 Marcelo Maronna, Cristina Trein, and João Almeida for connecting us with land owners.  
566 We are also grateful to ICMBio and IBAMA for providing us the study licenses, and to  
567 the managers of the conservation areas Edenice Souza (Floresta Nacional de São  
568 Francisco de Paula), and Soraya Ribeiro (Parque Natural Morro do Osso). We also thank  
569 Fabiana Quoos Mayer for technical assistance and Raquel Hohendorf, Diógenes  
570 Machado, Miguel Corrêa, and Nicole Böelter for their valuable help. Finally, we thank

571 Fundação de Apoio da Universidade Federal do Rio Grande do Sul for administrative  
572 support

573

## 574 **References**

575 1. Collar NJ, Long AJ, Jaime PRG. Birds and people: bonds in a timeless journey. 1st  
576 ed. Cambridge, UK: Birdlife International; 2007.

577 2. Alves RRN, Lima, JRF, Araujo HFP. The live bird trade in Brazil and its  
578 conservation implications: an overview. *Bird Conserv Int.* 2013; 23: 53–65.

579 3. Sodhi NS, Ehrlich PR. Conservation biology for all. 1st ed. New York: Oxford  
580 University Press Inc.; 2010.

581 4. Fitzpatrick JW, Rodewald AD. Bird conservation. In: Lovette IJ, Fitzpatrick JW,  
582 editors. *Handbook of bird biology*, 3rd ed. The Cornell Lab of Ornithology: Wiley;  
583 2016. pp. 579–639.

584 5. IUCN. Guidelines for the Management of Confiscated Live Organisms. Maddison  
585 N, editor. Gland, Switzerland: IUCN; 2019. pp. 38.  
586 <https://doi.org/10.2305/IUCN.CH.2019.03.en>.

587 6. IUCN. Guidelines for the Placement of confiscated Animals. Gland, Switzerland:  
588 IUCN; 2000.

589 7. Efe MA, Martins-Ferreira C, Olmos F, Mohr LV, Silveira LF. Diretrizes da  
590 Sociedade Brasileira de Ornitologia para a destinação de aves silvestres  
591 provenientes do tráfico e cativeiro. *Rev Bras Ornitol.* 2006; 14: 67–72.

592 8. Kock RA, Woodford MH, Rossiter PB. Disease risks associated with the  
593 translocation of wildlife. *Rev Sci Tech Off Int Epizoot.* 2010; 29: 329–350.  
594 <https://doi.org/10.20506/rst.29.2.1980>.

595 9. Edmands S. Between a rock and a hard place: evaluating the relative risks of  
596 inbreeding and outbreeding for conservation and management. *Mol Ecol.* 2007;  
597 16: 463–475.

- 598 10. Whitlock R, Stewart GB, Goodman SJ, Piertney SB, Butlin RK, Pullin AS, et al.  
599 A systematic review of phenotypic responses to between-population outbreeding.  
600 *Environ Evid.* 2013; 2: 13.
- 601 11. Schemnitz SD, Batcheller GR, Lovallo MJ, White HB, Fall MW. Capturing and  
602 handling wild animals. In: Silvy NJ, editor, *The wildlife technique manual*. Johns  
603 Hopkins University Press; 2009. pp. 232–269. Available from:  
604 [https://digitalcommons.unl.edu/icwdm\\_usdanwrc](https://digitalcommons.unl.edu/icwdm_usdanwrc).
- 605 12. FAO. Wild birds and avian influenza. An introduction to applied field research  
606 and disease sampling techniques. In: Whitworth D, Newman S, Mundkur T, Harris  
607 P, editors. *FAO animal production and health manual*; 2007. pp. 33–50. Available  
608 from: [www.fao.org/avianflu](http://www.fao.org/avianflu).
- 609 13. Ross AL. Capturando aves. In: Matter SV, Straube FC, Accordi IA, Piacentini  
610 VQ, Cândido-JR JF, editors. *Ornitologia e conservação—Ciência aplicada,*  
611 *técnicas de pesquisa e levantamento*. Technical Books Editora; 2010. pp. 79–104.
- 612 14. Ndlovu M. Birdcall lures improve passerine mist-net captures at a sub-tropical  
613 African savanna. *Plos One.* 2018; e0199595.  
614 <https://doi.org/10.1371/journal.pone.0199595>.
- 615 15. Crozier GE, Gawlik DE. The use of decoys as a research tool for attracting wading  
616 birds. *J Field Ornithol.* 2003; 74: 53–58.
- 617 16. Smith J. Decoy: how fake birds aid real research. 2014. Available from:  
618 <https://blog.nature.org/science/2014/10/30/decoy-fake-birds-real-research-video>.
- 619 17. Bezerra DMM, Araújo HFP, Alves RRN. Captura de aves silvestres no semiárido  
620 brasileiro: técnicas cinegéticas e implicações para conservação. *Trop Conserv Sci.*  
621 2012; 5: 50–66.
- 622 18. IUCN. The IUCN red list of threatened species. Cited 2019 March 10. Available  
623 from: <https://www.iucnredlist.org/species>.

- 624 19. Overbeck GE, Müller SC, Fidelis A, Pfadenhauer J, Pillar VD, Blanco CC, et al.  
625 Brazil's neglected biome: The South Brazilian Campos. *Perspect Plant Ecol Syst.*  
626 2007; 9: 101–116.
- 627 20. Adámoli J. Bases para uma política comum de conservação das terras úmidas do  
628 Pantanal e do Chaco. *Anais do III Simpósio sobre recursos naturais e sócio-*  
629 *econômicos do Pantanal.* Centro de Pesquisa Agropecuária do Pantanal; 2000. pp.  
630 1–15.
- 631 21. Silva MP, Mauro R, Mourão G, Coutinho M. Distribuição e quantificação de  
632 classes de vegetação do Pantanal através de levantamento aéreo. *Rev Bras Bot.*  
633 2000; 23: 143–152.
- 634 22. Freitas TG, Souza CS, Aoki C, Arakaki LMM, Stefanello TH, Sartori ALB, et al.  
635 Flora of Brazilian humid Chaco: composition and reproductive phenology. *Check*  
636 *List.* 2013; 9: 973–979.
- 637 23. Castro MS, Recco-Pimentel SM, Rocha GT. Karyotypic characterization of  
638 *Ramphastidae* (Piciformes, Aves). *Gen Mol Biol.* 2002; 25: 147–150.
- 639 24. Nogueira DM, Souza LM, Goldschmidt B, Silva CP, Monsores DW. The  
640 karyotype of the critically endangered Lear's macaw, *Anodorhynchus leari*  
641 Bonaparte 1856 (Aves, Psittaciformes). *Gen Mol Biol.* 2006; 29: 656–658.
- 642 25. Ravuth Natural Life. [video]. Cited 2017 July 4. Available from:  
643 <http://www.youtube.com/watch?v=X8f6FuvdQpM>.
- 644 26. Friend M, Toweill DE, Brownell RL, Nettles VF, Davis DS, Foreyt WJ. Section  
645 1–Chapter 6: Guidelines for proper care and use of wildlife in field research. In:  
646 Friend M, Franson JC, editors. *Field manual of wildlife diseases: general field*  
647 *procedures and diseases of birds*; 1999. pp. 53–72. Cited 2018 April 12. Available  
648 from: [https://pubs.usgs.gov/itr/1999/field\\_manual\\_of\\_wildlife\\_diseases.pdf](https://pubs.usgs.gov/itr/1999/field_manual_of_wildlife_diseases.pdf)
- 649 27. Kauffmann F, Le Minor L. Kauffmann-White Scheme. In: Patrick AD, Grimont  
650 PA, François-Xavier W, editors. *Antigenic formulae of Salmonella Serovars.* 9th  
651 ed. Paris, France: WHO (World Health Organization) and Institute Pasteur; 2007.  
652 Available from: [https://www.pasteur.fr/sites/default/files/veng\\_0.pdf](https://www.pasteur.fr/sites/default/files/veng_0.pdf).

- 653 28. Callison SA, Riblet SM, Sun S, Ikuta N, Hilt D, Leiting V, Kleven SH, Suarez  
654 DL, García M. Development and validation of a real-time Taqman polymerase  
655 chain reaction assay for the detection of *Mycoplasma gallisepticum* in naturally  
656 infected birds. Avian Dis. 2006; 50: 537–544.
- 657 29. Fraga AP, Vargas TD, Ikuta N, Fonseca ASK, Celmer AJ, Marques EK, Lunge  
658 VR. A Multiplex real-time PCR for detection of *Mycoplasma gallisepticum* and  
659 *Mycoplasma synoviae* in clinical samples from Brazilian commercial flocks. Bras  
660 J Microbiol. 2013; 44: 505–510.
- 661 30. Gomes CWC, Funkler GR, Andretta I, Gonçalves MO, Santos HF, Cruz CEF.  
662 Newcastle disease vaccination in captive-bred wild birds. Trop Anim Health Prod.  
663 2018; 50: 1349–1353.
- 664 31. Hailer F, Schreiber E, Miller J, Levin I, Parker P, Chesser R et al. Long-term  
665 isolation of a highly mobile seabird on the Galapagos. Proc R Soc B. 2010; 278:  
666 817–825.
- 667 32. Kumar S, Stecher G, Li M, Knyaz C, Tamura K. MEGA X: Molecular  
668 Evolutionary Genetics Analysis across Computing Platforms. Mol Biol Evol.  
669 2018; 35: 1547–1549.
- 670 33. Rozas J, Ferrer-Mata A, Sánchez-DelBarrio J, Guirao-Rico S, Librado P, Ramos-  
671 Onsins S et al. DnaSP 6: DNA Sequence Polymorphism Analysis of Large Data  
672 Sets. Mol Biol Evol. 2017; 34: 3299–3302.
- 673 34. Bandelt H, Forster P, Rohl A. Median-joining networks for inferring intraspecific  
674 phylogenies. Mol Biol Evol. 1999; 16: 37–48.
- 675 35. Tajima F. Statistical method for testing the neutral mutation hypothesis by DNA  
676 polymorphism. Genetics. 1989; 123: 585–595.
- 677 36. Fu YX. Statistical tests of neutrality of mutations against population growth,  
678 hitchhiking and background selection. Genetics. 1997; 147: 915–925.

- 679 37. Excoffier L, Lischer HEL. Arlequin suite ver 3.5: a new series of programs to  
680 perform population genetics analyses under Linux and Windows. *Mol Ecol Resour.*  
681 2010; 10: 564-567.
- 682 38. Excoffier L, Smouse PE, Quattro JM (1992) Analysis of molecular variance  
683 inferred from metric distances among DNA haplotypes: Application to human  
684 mitochondrial DNA restriction data. *Genetics.* 1992; 131: 479–491.
- 685 39. Drummond A, Rambaut A, Shapiro B, Pybus O. Bayesian Coalescent Inference  
686 of Past Population Dynamics from Molecular Sequences. *Mol Biol Evol.* 2005; 22:  
687 1185–1192.
- 688 40. Bouckaert R, Vaughan T, Barido-Sottani J, Duchêne S, Fourment M,  
689 Gavryushkina A et al. BEAST 2.5: An advanced software platform for Bayesian  
690 evolutionary analysis. *PLOS Comput Biol.* 2019; 15: e1006650.
- 691 41. Rambaut A, Drummond A, Xie D, Baele G, Suchard M. Posterior Summarization  
692 in Bayesian Phylogenetics Using Tracer 1.7. *Syst Biol.* 2018; 67: 901–904.
- 693 42. Nabholz B, Lanfear R, Fuchs J. Body mass-corrected molecular rate for bird  
694 mitochondrial DNA. *Mol Ecol.* 2016; 25: 4438–4449.
- 695 43. de Faria IP, de Paula WS. Body masses of birds from Atlantic forest region,  
696 southeastern Brazil. *Ornitol Neotrop.* 2008; 19: 599–606.
- 697 44. Segura LN, Mahler B, Berkunsky I, Reboresda JC. Nesting biology of the Red-  
698 crested Cardinal (*Paroaria coronata*) in south temperate forests of central  
699 Argentina. *Wilson J Ornithol.* 2015; 127: 249–258.
- 700 45. RENCTAS. 1º Relatório Nacional sobre o Tráfico de Fauna Silvestre; 2002.  
701 Available from: [http://www.renctas.org.br/wp-](http://www.renctas.org.br/wp-content/uploads/2014/02/REL_RENCTAS_pt_final.pdf)  
702 [content/uploads/2014/02/REL\\_RENCTAS\\_pt\\_final.pdf](http://www.renctas.org.br/wp-content/uploads/2014/02/REL_RENCTAS_pt_final.pdf)
- 703 46. IBAMA. Relatório Técnico CETAS 2002–2014. Brasília, Brasil; 2016. Available  
704 from:  
705 [http://www.consultaesic.cgu.gov.br/busca/dados/Lists/Pedido/Attachments/53910](http://www.consultaesic.cgu.gov.br/busca/dados/Lists/Pedido/Attachments/539109/RESPOSTA_PEDIDO_an.pdf)  
706 [9/RESPOSTA\\_PEDIDO\\_an.pdf](http://www.consultaesic.cgu.gov.br/busca/dados/Lists/Pedido/Attachments/539109/RESPOSTA_PEDIDO_an.pdf)

- 707 47. Lindenmayer DB, Wood JT, McBurney L, MacGregor C, Youngentob K, Banks  
708 SC. How to make a common species rare: a case against conservation  
709 complacency. *Biol Conserv.* 2011; 144: 1663–1672.
- 710 48. Araújo ACB, Behr ER, Longhi SJ, Menezes PTS, Kanieski MR. Diagnóstico  
711 sobre a fauna apreendida e entregue espontaneamente na região central do Rio  
712 Grande do Sul, Brasil. *Rev Bras Biocienc.* 2010; 8: 279–284.
- 713 49. Viana IR, Zocche JJ. Avifauna apreendida no extremo sul catarinense: apreensões  
714 feitas durante oito anos de fiscalização e combate à captura de aves silvestres. *Braz*  
715 *J Biosci.* 2013; 11: 395–404.
- 716 50. Ferreira JM. Contribuição da genética de populações à investigação sobre o tráfico  
717 de fauna no Brasil: desenvolvimento de microssatélites e análise da estrutura  
718 genética em *Paroaria dominicana* e *Saltator similis* (Aves: Passeriformes:  
719 Thraupidae). Doctoral dissertation, Instituto de Biociências da Universidade de  
720 São Paulo. 2012. DOI. 10.11606/T.41.2012.tde-17122012-200300. Available from:  
721 [https://teses.usp.br/teses/disponiveis/41/41131/tde-17122012-](https://teses.usp.br/teses/disponiveis/41/41131/tde-17122012-200300/publico/Juliana_Ferreira.pdf)  
722 [200300/publico/Juliana\\_Ferreira.pdf](https://teses.usp.br/teses/disponiveis/41/41131/tde-17122012-200300/publico/Juliana_Ferreira.pdf)
- 723 51. Ferreira JM, Burnham-Curtis M, Schunck F, Rocha M, Myiaki CY, Silveira LF,  
724 et al. Development of novel polymorphic microsatellite markers for four bird  
725 species exploited by the illegal wildlife trade in Brazil. *Conserv Genet Resour.*  
726 2015; 7: 435–436.
- 727 52. Godoy SN, Matushima ER. A survey of diseases in passeriform birds obtained  
728 from illegal wildlife trade in São Paulo City, Brazil. *J Avian Med Surg.* 2010; 24:  
729 199–209.
- 730 53. Byers BE, Kroodsma DE. Avian vocal behavior. In: Lovette IJ, Fitzpatrick JW,  
731 editors. *Handbook of bird biology*. 3rd ed. The Cornell Lab of Ornithology: Wiley;  
732 2016. pp. 355–405.
- 733 54. Ralph CJ, Dunn E, Peach WJ, Handel CM. Recommendations for the use of mist  
734 nets for inventory and monitoring of bird populations. *Stud Avian Biol.* 2004; 29:  
735 187–196.

- 736 55. Martin SG. A technique for capturing nesting grassland birds with mist nets. Bird  
737 Banding. 1968; 40: 233–237.
- 738 56. Phillips GN, Derryberry EP. Vocal performance is a salient signal for male–male  
739 competition in White-crowned Sparrows. The Auk. 2017; 134: 564–574.
- 740 57. Spotswood EN, Goodman KR, Carlisle J, Cormier RL, Humple DH, Rousseau J,  
741 et al. How safe is mist-netting? Evaluating the risk of injury and mortality to birds.  
742 Methods Ecol Evol. 2012; 3: 29–38.
- 743 58. Clewley GD, Robinson RA, Clark JA. Estimating mortality rates among  
744 passerines caught for ringing with mist nets using data from previously ringed  
745 birds. Ecol Evol. 2018; 8: 5164–5172.
- 746 59. Thomas NJ, Hunter DB, Atkinson CT. Infectious diseases of wild birds. 1st ed.  
747 Oxford, UK: Blackwell Publishing; 2007.
- 748 60. MAPA. Ministério da Agricultura, Pecuária e Abastecimento. Available from:  
749 [http://www.agricultura.gov.br/assuntos/saude-animal-e-vegetal/saude-](http://www.agricultura.gov.br/assuntos/saude-animal-e-vegetal/saude-animal/programas-de-saude-animal/saude-avicola)  
750 [animal/programas-de-saude-animal/saude-avicola](http://www.agricultura.gov.br/assuntos/saude-animal-e-vegetal/saude-animal/programas-de-saude-animal/saude-avicola)
- 751 61. Oliveira-Júnior JG, Portz C, Loureiro BO, Schiavo PA, Fedullo LPL, Mazur C, et  
752 al. Vírus da doença de Newcastle em aves não vacinadas no estado do Rio de  
753 Janeiro. Cienc Rural. 2003; 33: 381–383.
- 754 62. Camenisch G, Bandli R, Hoop R. Monitoring of wild birds for Newcastle disease  
755 virus in Switzerland using real time RT-PCR. J Wildl Dis. 2008; 44: 772–776.
- 756 63. Benskin CM, Wilson K, Jones K, Hartley R. Bacterial pathogens in wild birds: a  
757 review of the frequency and effects of infection. Biol Rev. 2009; 84: 349–373.
- 758 64. Abulreesh HH, Goulder R, Scott GW. Wild birds and human pathogens in the  
759 context of ringing and migration. Ringing Migr. 2007; 23: 193–200. Available  
760 from: <https://doi.org/10.1080/03078698.2007.9674363>.
- 761 65. Tizard I. Salmonellosis in wild birds. Semin Avian Exotic Pet Med. 2004; 13: 50–  
762 66.



- 763 66. Braconaro P, Saidenberg AB, Benite NR, Zuniga E, Silva AM, Sanches TC, et al.  
764 Detection of bacteria and fungi and assessment of the molecular aspects and  
765 resistance of *Escherichia coli* isolated from confiscated passerines intended for  
766 reintroduction programs. *Microb Pathog.* 2015; 88: 65–72.
- 767 67. Cunha MPV, Guimarães MB, Davies YM, Milanelo L, Knöbl T. Bactérias gram-  
768 negativas em cardeais (*Paroaria coronata* e *Paroaria dominicana*) apreendidos no  
769 tráfico de animais silvestres. *Braz J Vet Res Anim Sci.* 2016; 53: 107–111.
- 770 68. Hoffer E, Silva-Filho SJ, Reis EMF. Sorovares de *Salmonella* isolados de  
771 matérias-primas e de ração para aves no Brasil. *Pesq Vet Bras.* 1998; 18: 21–27.
- 772 69. Moraes DMC. Investigação bacteriológica e molecular de *Salmonella* spp. em  
773 granjas de postura comercial. Doctoral dissertation, Universidade Federal de  
774 Goiás, 2014. Available from:  
775 [https://ppgca.evz.ufg.br/up/67/o/Tese\\_Dunya\\_Mara\\_Cardoso\\_Moraes.pdf](https://ppgca.evz.ufg.br/up/67/o/Tese_Dunya_Mara_Cardoso_Moraes.pdf)
- 776 70. Cummings KJ, Warnick LD, Elton M, Rodriguez-Rivera LD, Siler JD, Wright  
777 EM, et al. *Salmonella enterica* Serotype Cerro among dairy cattle in New York: an  
778 emerging pathogen? *Foodborne Pathog Dis.* 2010; 7: 659–665.
- 779 71. Fritz BA, Thomas CB, Yuill TM. Serological and microbiological survey of  
780 *Mycoplasma gallisepticum* in wild turkeys (*Meleagris gallopavo*) from six western  
781 states. *J Wildl Dis.* 1992; 28: 10–20.
- 782 72. Júnior AM, Taunde P, Zandamela AF, Junior AP, Chilundo A, Costa R, et al.  
783 Serological screening suggests extensive presence of *Mycoplasma gallisepticum*  
784 and *Mycoplasma synoviae* in backyard chickens in Southern Mozambique. *J Vet*  
785 *Med.* 2017; <http://dx.doi.org/10.1155/2017/2743187>.
- 786 73. Teixeira VCM, Baptista DQ, Carlos FC, Menezes WR, José DS, Barreto ML, et  
787 al. Situação epidemiológica da micoplasmose aviária no Estado do Rio de Janeiro.  
788 *Rev Bras Vet Med.* 2015; 34: 379–385.
- 789 74. Dhondt AA, DeCoste J, Ley DH, Hochachka WM. Diverse wild bird host range  
790 of *Mycoplasma gallisepticum* in Eastern North America. *Plos One.* 2014; e103553.  
791 <https://doi.org/10.1371/journal.pone.0103553>.

- 792 75. Hartup BK, Kollias GV, Ley DH. Mycoplasmal conjunctivitis in songbirds from  
793 New York. *J Wildl Dis.* 2000; 36: 257–264.
- 794 76. Carvalho AM, Andrade MA, Linhares GF, Jaime VS. Pesquisa de *Mycoplasma*  
795 em aves da família Psittacidae mantidas em diferentes cativeiros no Brasil Central.  
796 *Pesq Vet Bras.* 2017; 37: 1159–1164.
- 797 77. Michiels T, Welby S, Vanrobaeys M, Quinet C, Rouffaer L, Lens L, et al.  
798 Prevalence of *Mycoplasma gallisepticum* and *Mycoplasma synoviae* in commercial  
799 poultry, racing pigeons, and wild birds in Belgium. *Avian Pathol.* 2016; 45: 244–  
800 252.
- 801 78. Guimarães MB, Hurtado R, Bello CP, Vanstreels RET, Ferreira AJP. Surveillance  
802 for Newcastle Disease Virus, Avian Influenza Virus and *Mycoplasma*  
803 *gallisepticum* in wild birds near commercial poultry farms surrounded by Atlantic  
804 rainforest remnants, Southeastern Brazil. *Braz J Poult Sci.* 2016; 18: 387–394.
- 805 79. Farmer KL, Hill GE, Roberts SR. Susceptibility of wild songbirds to the house  
806 finch strain of *Mycoplasma gallisepticum*. *J Wildl Dis.* 2005; 41: 317–325.
- 807 80. Hidasi HW. Detecção de *Salmonella* sp., *Mycoplasma* spp., *Escherichia coli* de  
808 aves sinantrópicas da região metropolitana de Goiânia-Goiás. Doctoral  
809 dissertation, Escola de Veterinária e Zootecnia da Universidade Federal de Goiás.  
810 2013. Available from:  
811 [https://ppgca.evz.ufg.br/up/67/o/Tese2013\\_Hilari\\_Hidasi.pdf](https://ppgca.evz.ufg.br/up/67/o/Tese2013_Hilari_Hidasi.pdf)
- 812 81. Fischer JR, Stallknecht DE, Luttrell P, Dhondt AA, Converse KA. Mycoplasmal  
813 conjunctivitis in wild songbirds: the spread of a new contagious disease in a mobile  
814 host population. *Emerg Infect Dis.* 1997; 3: 69–72.
- 815 82. Pennycott TW, Ross HM, McLaren IM, Park A, Hopkins GF, Foster G. Causes of  
816 death of wild birds of the family Fringillidae in Britain. *Vet Rec.* 1998; 143: 155–  
817 158.
- 818 83. Oliveira LGS, Boabaid FM, Lorenzett MP, Rolim V, Santos HF, Driemeier D, et  
819 al. Outbreaks of mycoplasmosis and histomoniasis in a southern Brazilian flock of  
820 ornamental birds. *Acta Sci Vet.* 2017; 45: 200. Available from:

- 821 [https://pdfs.semanticscholar.org/4f30/34374dd9c114f5bb7e7e9dbfc8551404571f.](https://pdfs.semanticscholar.org/4f30/34374dd9c114f5bb7e7e9dbfc8551404571f.pdf)  
822 [pdf](https://pdfs.semanticscholar.org/4f30/34374dd9c114f5bb7e7e9dbfc8551404571f.pdf)
- 823 84. Domínguez M, Tiedemann R, Reboreda J, Segura L, Tittarelli F, Mahler B.  
824 Genetic structure reveals management units for the yellow cardinal (*Gubernatrix*  
825 *cristata*), endangered by habitat loss and illegal trapping. *Conserv Genet.* 2017; 18:  
826 1131–1140.
- 827 85. Rodríguez-Cajarville M, Calderón L, Tubaro P, Cabanne G. Body size and genetic  
828 variation in the White-tipped Plantcutter (*Phytotoma rutila*: Cotingidae) suggest  
829 ecological divergence across the Chaco–Andes dry forest belt. *J Ornithol.* 2019;  
830 160: 947–961.
- 831 86. Barker F, Benesh M, Vandergon A, Lanyon S. Contrasting Evolutionary  
832 Dynamics and Information Content of the Avian Mitochondrial Control Region  
833 and ND2 Gene. *PLOS ONE.* 2012; 7: e46403.
- 834 87. Carnaval A, Hickerson M, Haddad C, Rodrigues M, Moritz C. Stability Predicts  
835 Genetic Diversity in the Brazilian Atlantic Forest Hotspot. *Science.* 2009; 323:  
836 785–789.
- 837 88. Cabanne G, Dhorta F, Sari E, Santos F, Miyaki C. Nuclear and mitochondrial  
838 phylogeography of the Atlantic forest endemic *Xiphorhynchus fuscus* (Aves:  
839 Dendrocolaptidae): Biogeography and systematics implications. *Mol*  
840 *Phylogenetics Evol.* 2008; 49: 760–773.
- 841 89. d’Horta F, Cabanne G, Meyer D, Miyaki C. The genetic effects of Late Quaternary  
842 climatic changes over a tropical latitudinal gradient: diversification of an Atlantic  
843 Forest passerine. *Mol Ecol.* 2011; 20: 1923–1935.
- 844 90. Maldonado-Coelho M. Climatic oscillations shape the phylogeographical  
845 structure of Atlantic Forest fire-eye antbirds (Aves: Thamnophilidae). *Biol J Linn*  
846 *Soc.* 2012; 105: 900–924.
- 847 91. Cabanne G, Sari E, Meyer D, Santos F, Miyaki C. Matrilineal evidence for  
848 demographic expansion, low diversity and lack of phylogeographic structure in the

- 849 Atlantic forest endemic Greenish Schiffornis *Schiffornis virescens* (Aves:  
850 Tityridae). J Ornithol. 2012; 154: 371–384.
- 851 92. Batalha-Filho H, Cabanne G, Miyaki C. Phylogeography of an Atlantic forest  
852 passerine reveals demographic stability through the last glacial maximum. Mol  
853 Phylogenetics Evol. 2012; 65: 892–902.
- 854 93. Amaral F, Albers P, Edwards S, Miyaki C. Multilocus tests of Pleistocene refugia  
855 and ancient divergence in a pair of Atlantic Forest antbirds (Myrmeciza). Mol Ecol.  
856 2013; 22: 3996–4013.
- 857 94. Batalha-Filho H, Miyaki C. Late Pleistocene divergence and postglacial expansion  
858 in the Brazilian Atlantic Forest: multilocus phylogeography of *Rhopias gularis*  
859 (Aves: Passeriformes). J Zool Syst Evol Res. 2016; 54: 137–147.
- 860 95. Trujillo-Arias N, Dantas G, Arbeláez-Cortés E, Naoki K, Gómez M, Santos F et  
861 al. The niche and phylogeography of a passerine reveal the history of biological  
862 diversification between the Andean and the Atlantic forests. Mol Phylogenetics  
863 Evol. 2017; 112: 107–121.
- 864 96. Cabanne G, Santos F, Miyaki C. Phylogeography of *Xiphorhynchus fuscus*  
865 (Passeriformes, Dendrocolaptidae): vicariance and recent demographic expansion  
866 in southern Atlantic forest. Biol J Linn Soc. 2007; 91: 73–84.
- 867 97. Cabanne G, d'Horta F, Meyer D, Silva J, Miyaki C. Evolution of *Dendrocolaptes*  
868 *platyrostris* (Aves: Furnariidae) between the South American open vegetation  
869 corridor and the Atlantic forest. Biol J Linn Soc. 2011; 103: 801–820.
- 870 98. Dantas G, Sari E, Cabanne G, Pessoa R, Marini M, Miyaki C et al. Population  
871 genetic structure of the Atlantic Forest endemic *Conopophaga lineata*  
872 (Passeriformes: Conopophagidae) reveals a contact zone in the Atlantic Forest. J  
873 Ornithol. 2014; 156: 85–99.
- 874 99. Cabanne G, Campagna L, Trujillo-Arias N, Naoki K, Gómez I, Miyaki C et al.  
875 Phylogeographic variation within the Buff-browed Foliage-gleaner (Aves:  
876 Furnariidae: *Syndactyla rufosuperciliata*) supports an Andean-Atlantic forests  
877 connection via the Cerrado. Mol Phylogenetics Evol. 2019; 133: 198–213.

878 100. Edmands S. Does parental divergence predict reproductive compatibility?.  
879 Trends Ecol Evol. 2002; 17: 520–527.

880 101. Frankham R, Ballou J, Eldridge M, Lacy R, Ralls K, Dudash M et al. Predicting  
881 the Probability of Outbreeding Depression. Conserv Biol. 2011; 25: 465–475.

882 102. Magroski LM, Pessoa AN, Lucena WG, Loures-Ribeiro A, Araújo CB. Where  
883 to release birds seized from illegal traffic? The value of vocal analyses and  
884 ecological niche modeling. Perspect Ecol Conserv. 2017; 15: 91–101.

885

## 886 **Supporting information captions**

887 **S1 Table** – Captures.

888 **S2 Table** – Genetic samples.

889 **S3 Table** – Live decoys.

890 **S4 Table** – Health tests.

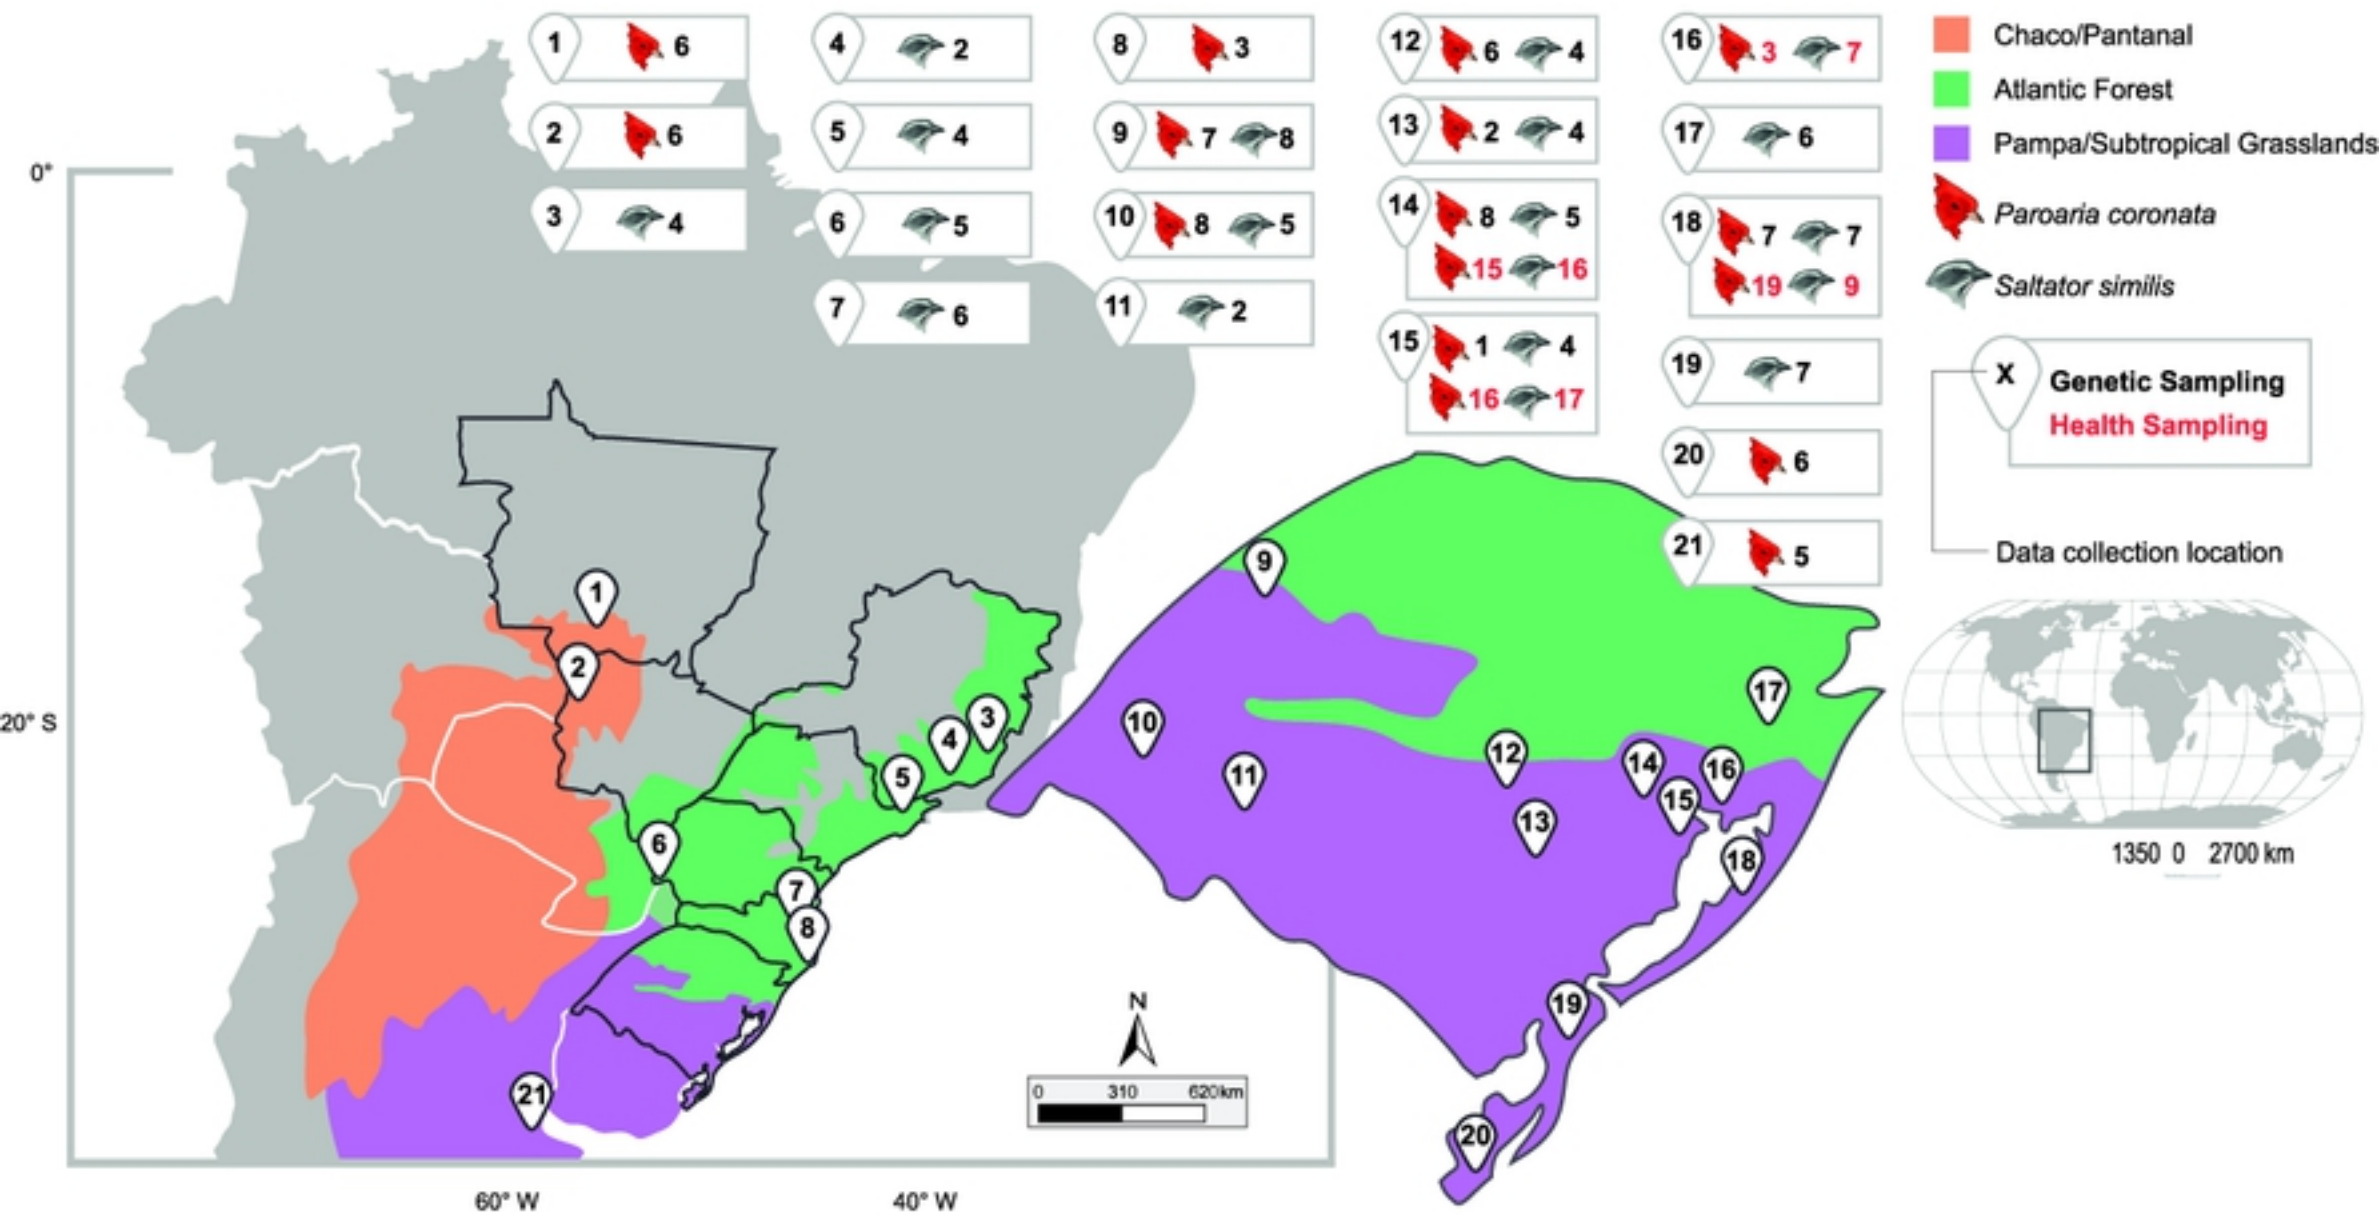

Figure 1

A.

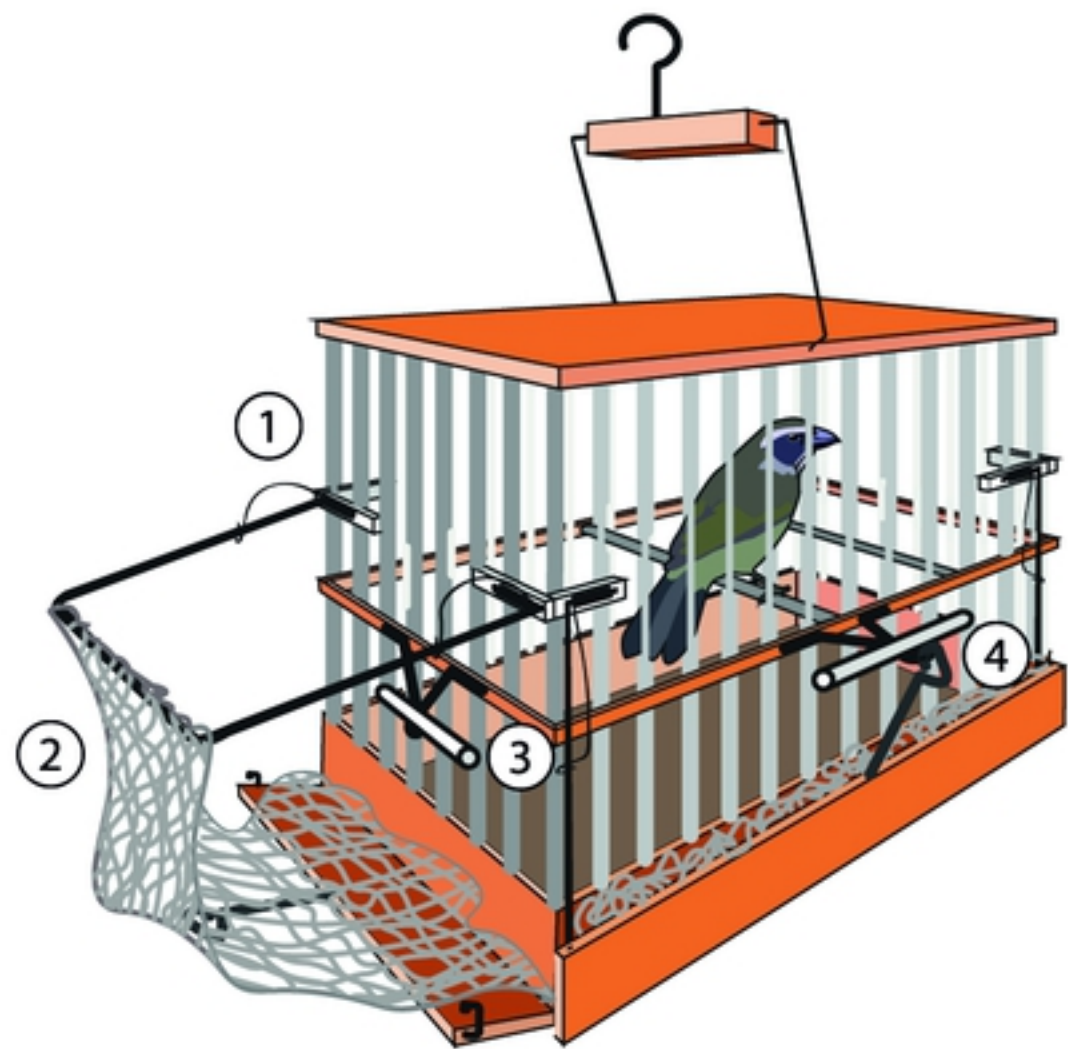

B.

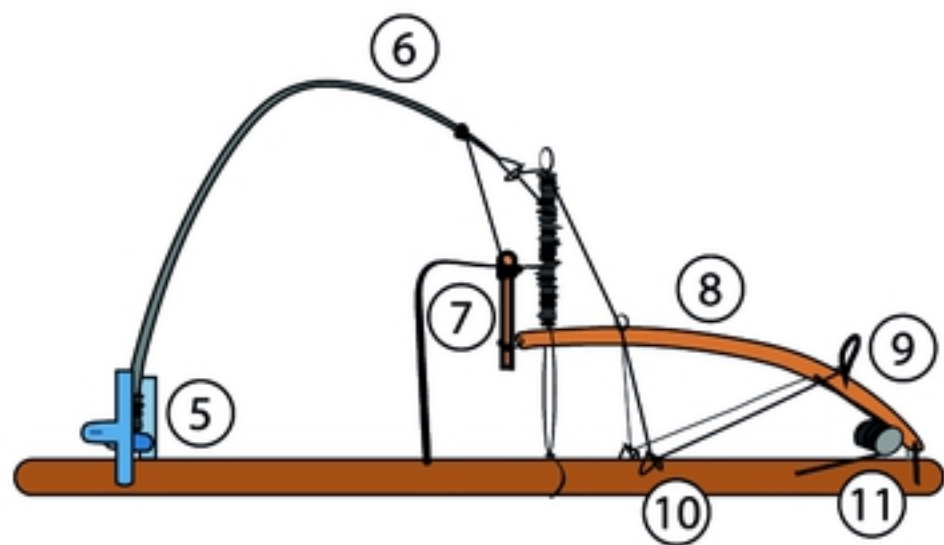

C.

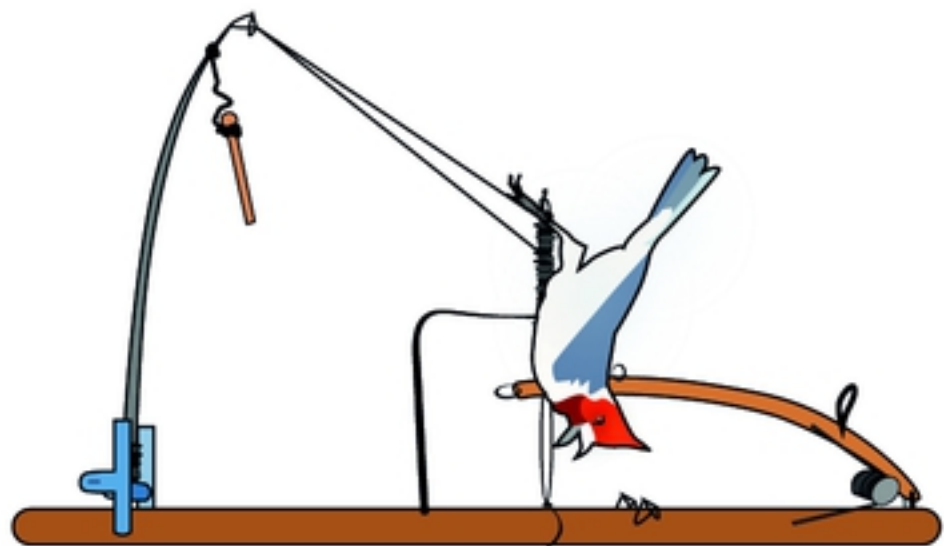

Figure 2

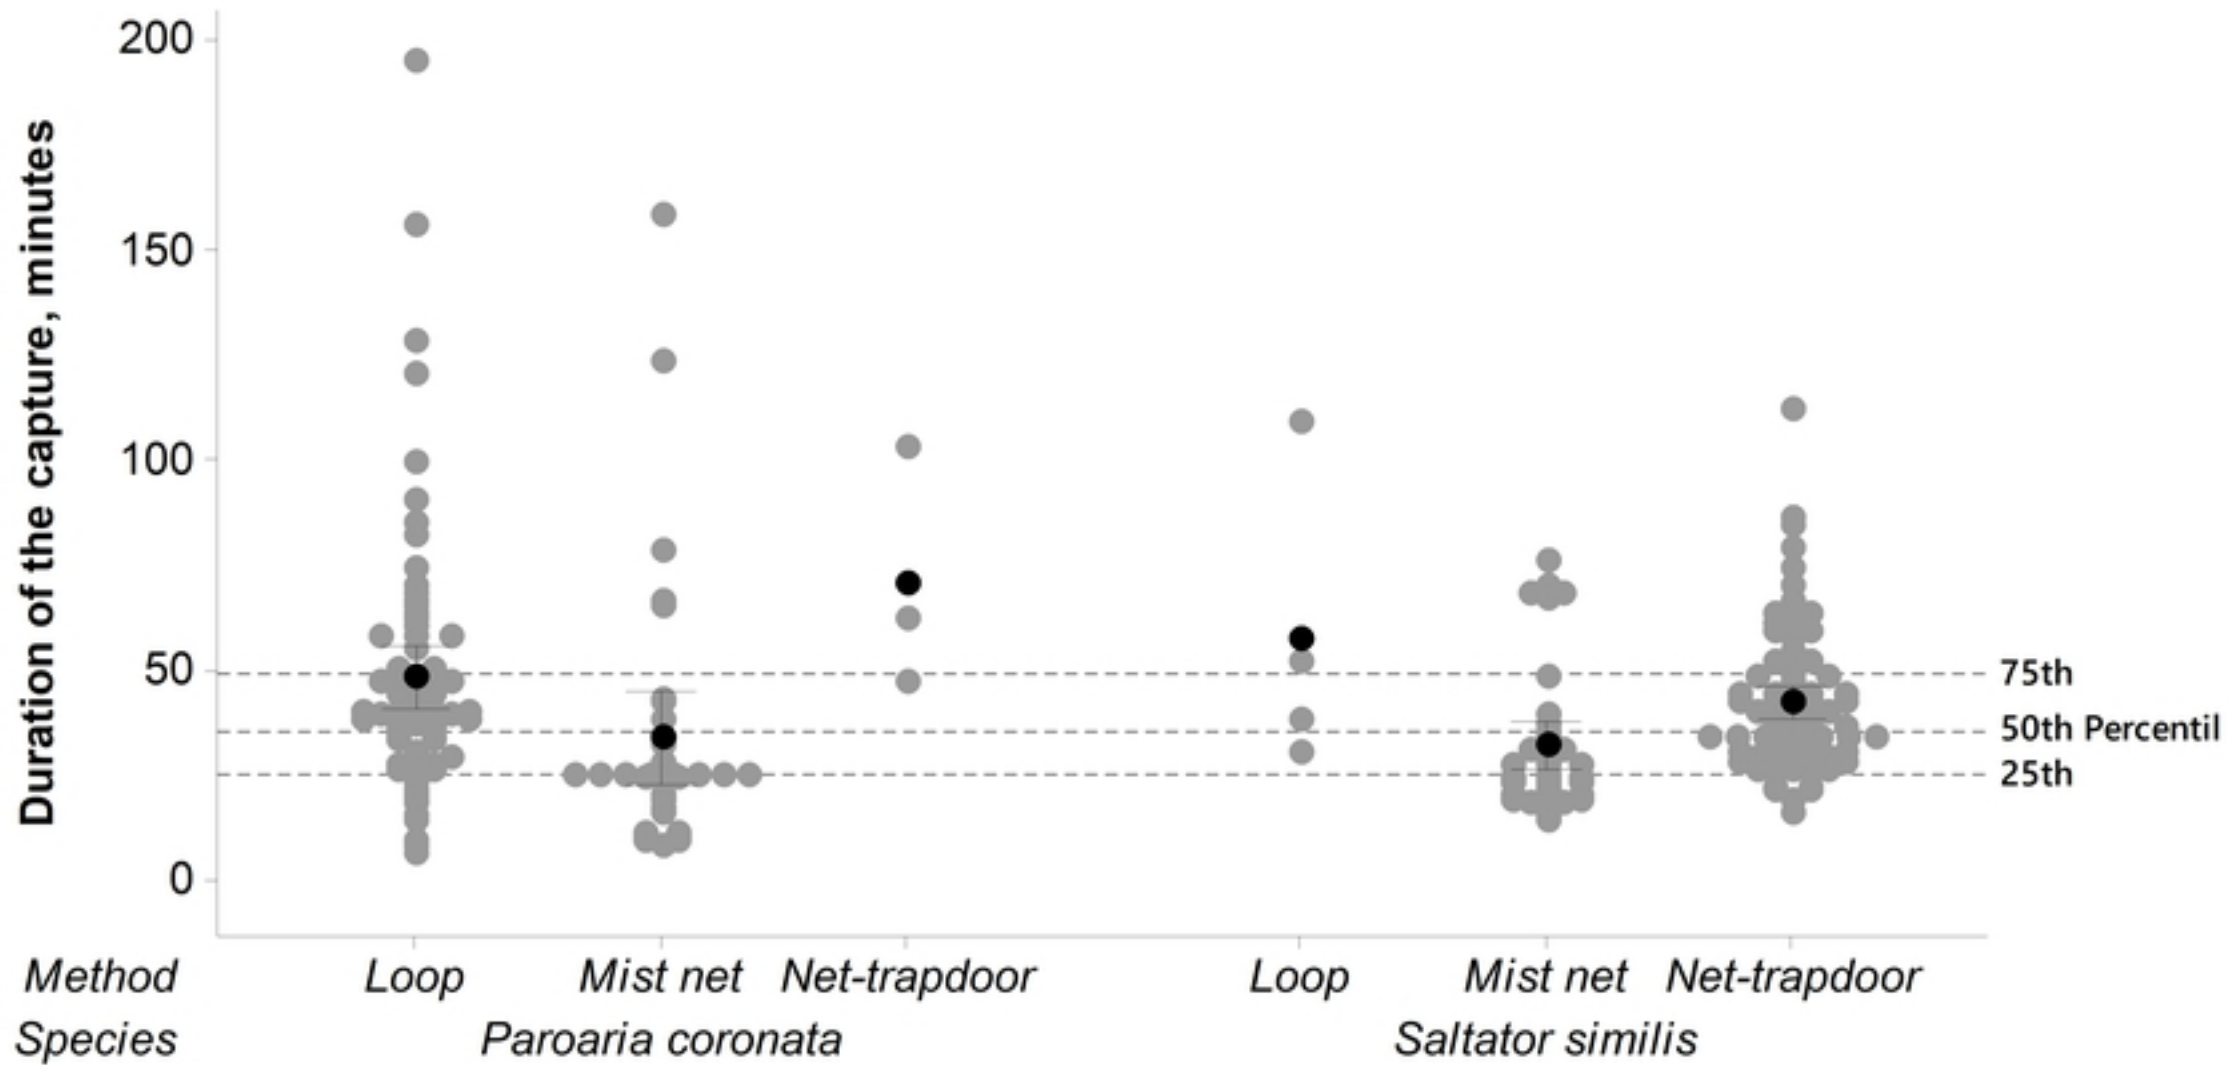

Figure 3



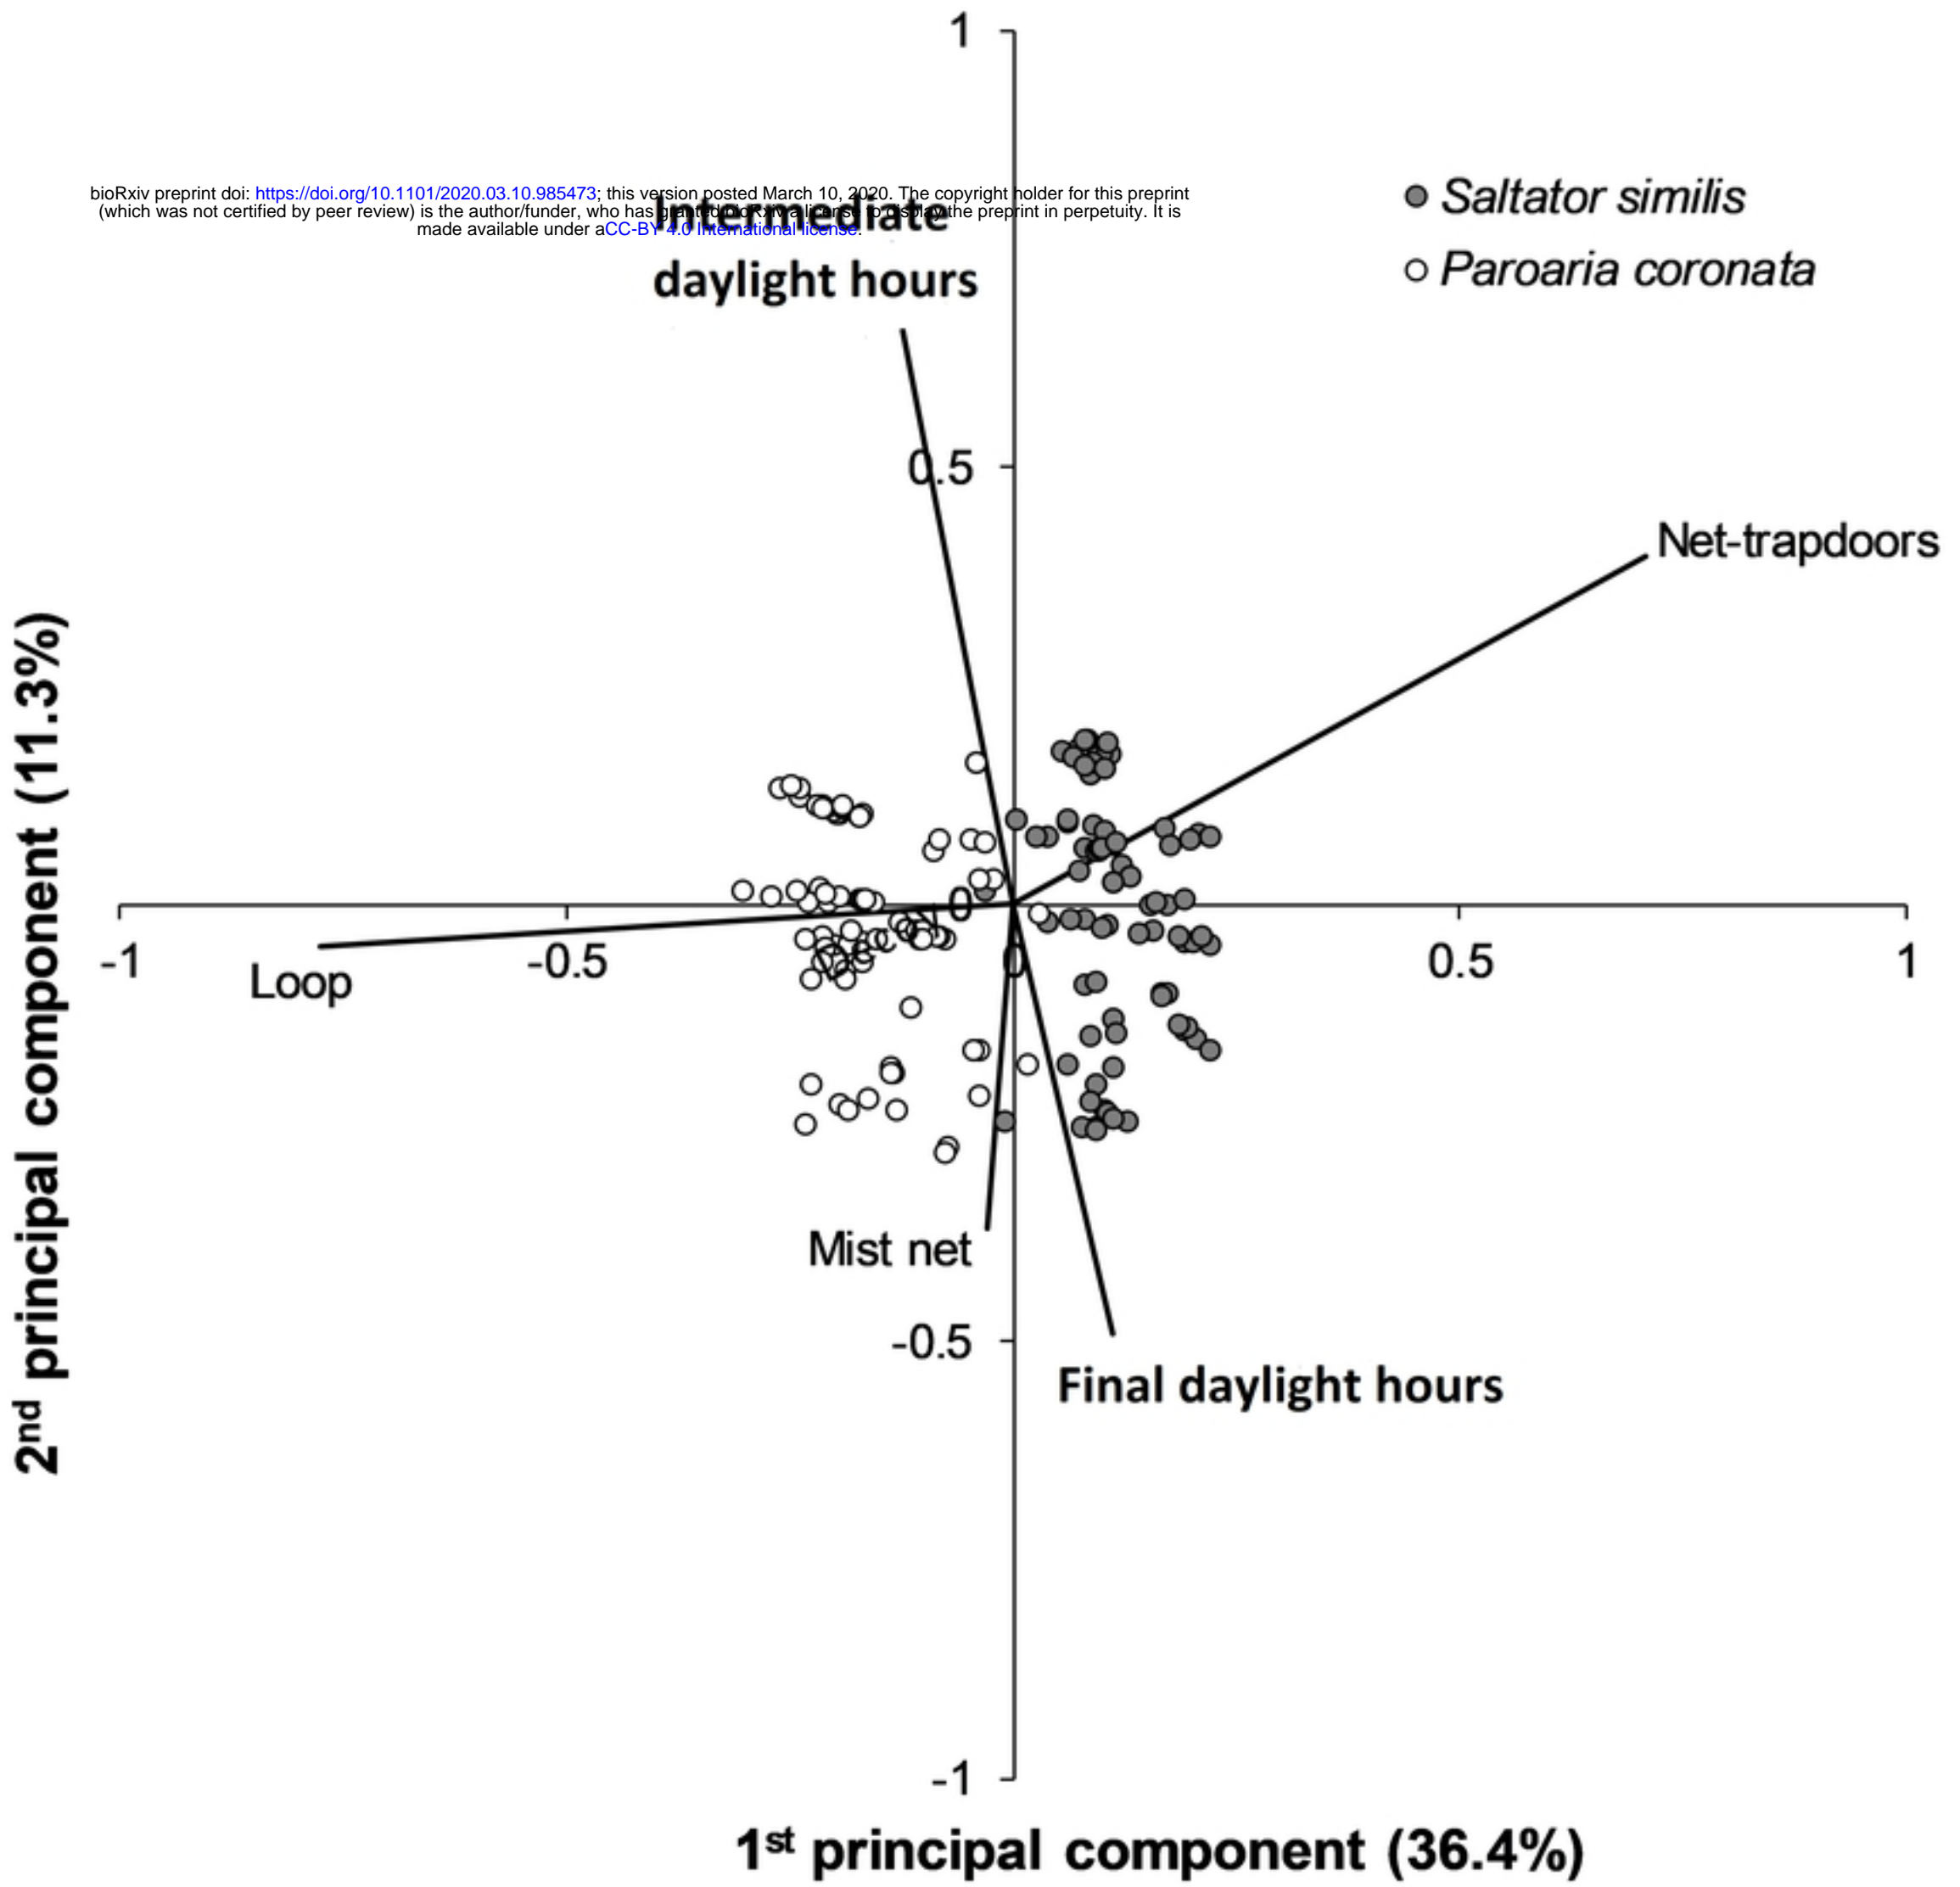

Figure 4



**A**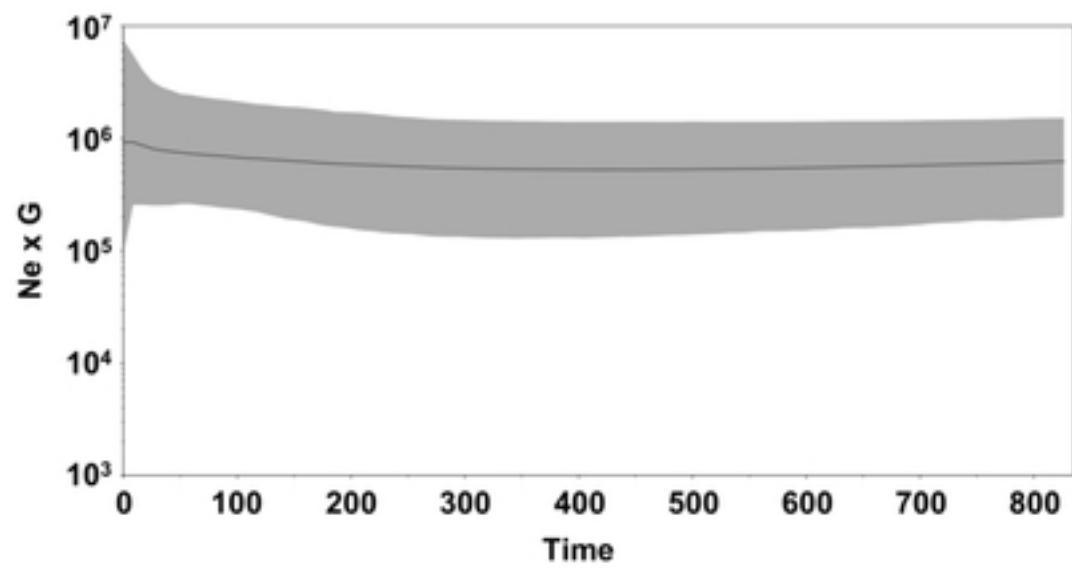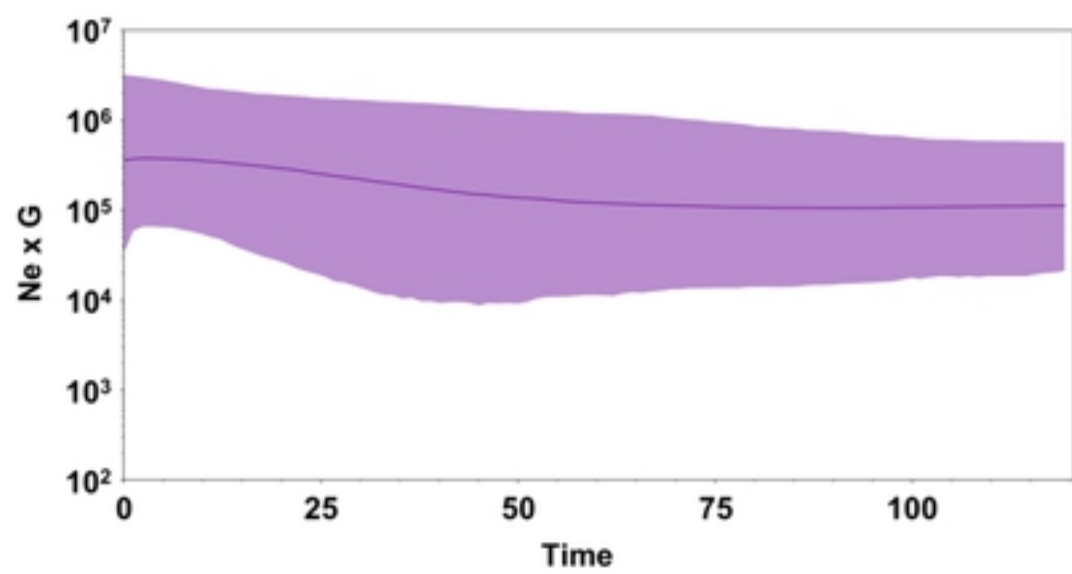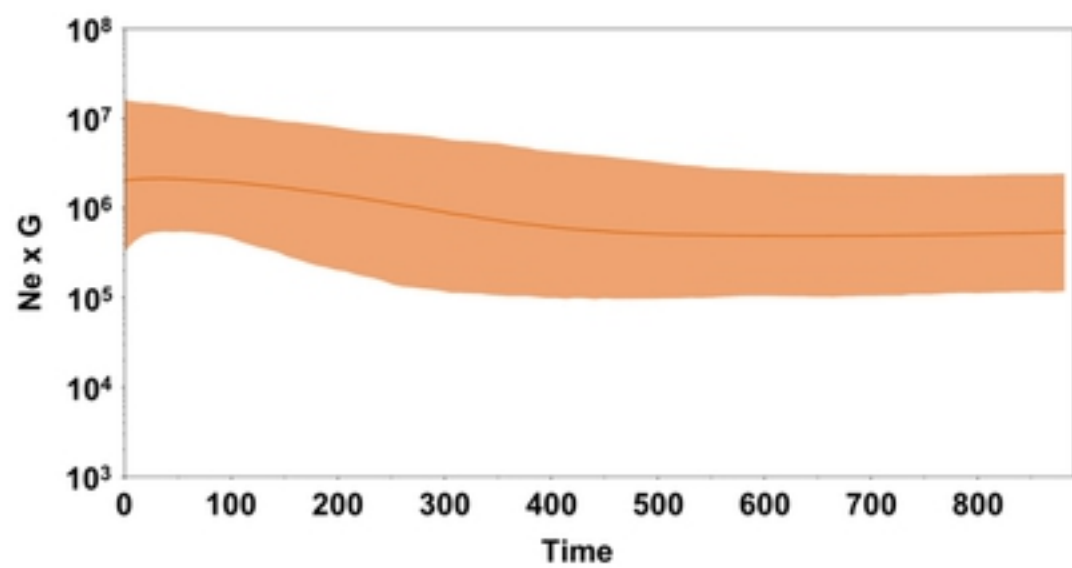**B**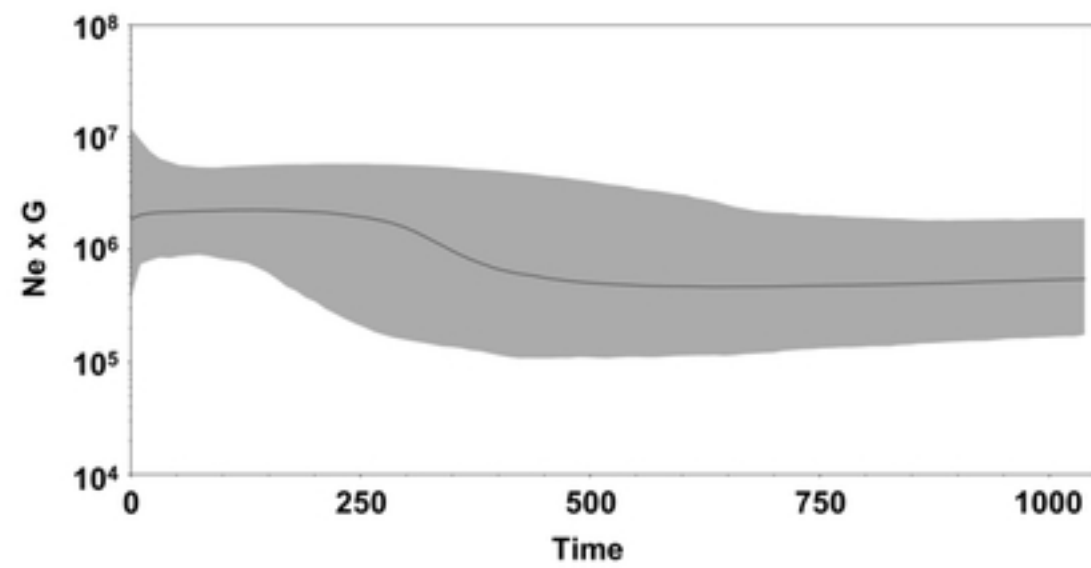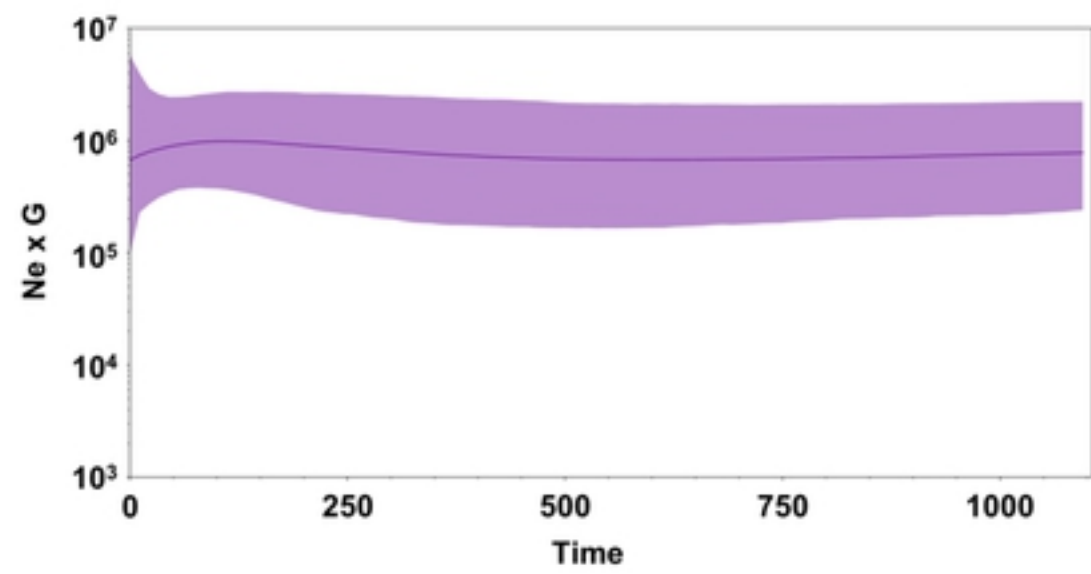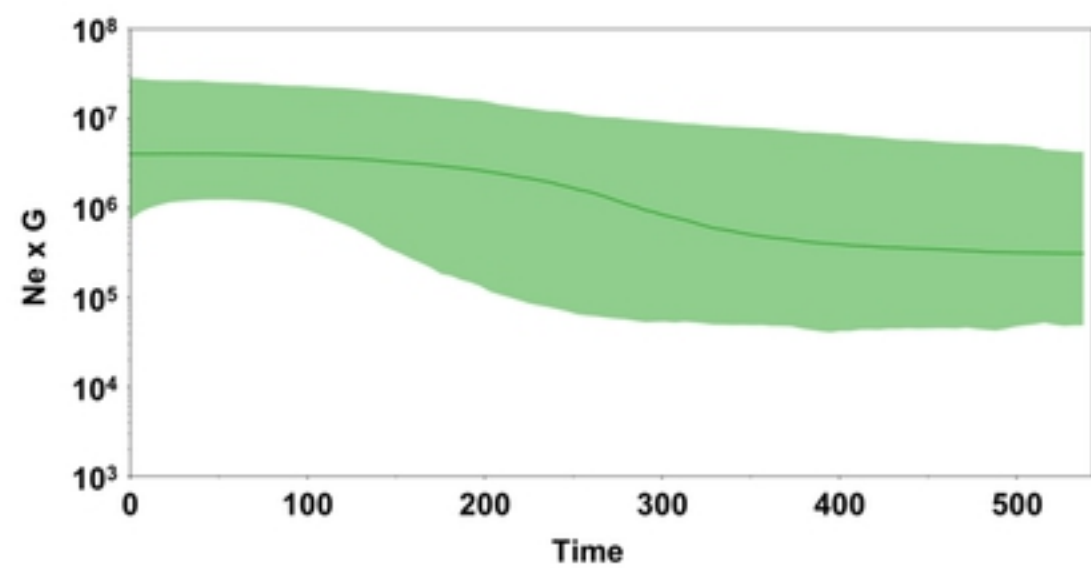

Figure 6
